**Conservation Genomics of Urban Populations of Streamside Salamander (*Ambystoma barbouri*)**

N. Wade Hubbs<sup>&</sup>, Carla R. Hurt<sup>1&\*</sup>, John Niedzwiecki<sup>2</sup>, Brian Leckie<sup>1</sup> and David Withers<sup>3</sup>

<sup>1</sup>*Department of Biology, Tennessee Technological University, Cookeville, TN*

<sup>2</sup>*Belmont University, Nashville TN*

<sup>3</sup>*Tennessee Department of Environment and Conservation, Nashville, TN*

*\*Correspondence: Carla Hurt*

E-mail: [churt@tntech.edu](mailto:churt@tntech.edu)

<sup>&</sup>Authors contributed equally to this work

## Abstract

1  
2 In Tennessee, populations of the state endangered Streamside Salamander (*Ambystoma*  
3 *barbouri*) are in decline as their distribution lies mostly within rapidly developing areas in the  
4 Nashville Basin. Information regarding the partitioning of genetic variation among populations  
5 of *A. barbouri*, and the taxonomic status of these populations relative to northern populations  
6 and their congener, the smallmouth salamander (*A. texanum*), have important implications for  
7 management and conservation of this species. Here we combined mitochondrial sequencing and  
8 genome-wide single nucleotide polymorphism (SNP) data generated using Genotyping-by-  
9 Sequencing (GBS) to investigate patterns of genetic variation within Tennessee populations of  
10 *A. barbouri*, to assess their relationship to populations in Kentucky, and to examine their  
11 phylogenetic relationship to the closely related *A. texanum*. Results from phylogenetic  
12 reconstructions reveal a complex history of Tennessee *A. barbouri* populations with regards to  
13 northern populations, unisexual *A. barbouri*, and *A. texanum*. Patterns of mitochondrial  
14 sequence variation suggest that *A. barbouri* may have originated within Tennessee and expanded  
15 north multiple times into Kentucky, Ohio, Indiana and West Virginia. Phylogenetic  
16 reconstructions based on genome-wide SNP data contradict results based on mitochondrial DNA  
17 and correspond to geographic and taxonomic boundaries. Variation in allele frequencies at SNP  
18 genotypes, as identified by multivariate analyses and Bayesian assignment tests, identified three  
19 evolutionary significant units (ESUs) for *A. barbouri* within the state of Tennessee. Collectively,  
20 these results emphasize the need for prioritizing conservation needs of Tennessee populations of  
21 *A. barbouri* to ensure the long-term persistence of this species.

22

## 23 Introduction

24 Genetic variation, population structure and demographic history are increasingly  
25 recognized as important factors for the design of effective conservation strategies (Geist 2010).  
26 Streamside salamander (*Ambystoma barbouri*, Fig. 1) populations in Middle Tennessee are  
27 declining due to rapid urbanization in and around the Nashville Basin and as a result, were  
28 reclassified from "deemed in need of management" to state endangered by the Tennessee  
29 Wildlife Resources Agency (TWRA) (Withers et al. 2009, TWRA 2018, Anderson et al. 2014).  
30 Population fragmentation and loss of genetic variation that inevitably accompany loss of habitat  
31 threaten the long-term adaptive potential and persistence of *A. barbouri*, but can be mitigated by  
32 management actions aimed at maintaining genetic diversity. Information regarding *A. barbouri*'s  
33 taxonomy, population structure and patterns of genetic variation are currently needed to  
34 prioritize conservation needs and to efficiently allocate management resources. Genomic tools  
35 are increasingly being used to improve recovery and management planning in at-risk salamander  
36 species by informing taxonomic relationships, demographic histories, and biologically  
37 meaningful units of conservation that will preserve genetic diversity and the long-term adaptive  
38 potential of species.

39 Taxonomic uncertainties surrounding the evolutionary relationship between *A. barbouri*  
40 and its sister-species *A. texanum* (smallmouthed salamander) are a concern for precisely  
41 identifying targets of conservation. These two species are nearly indistinguishable based on  
42 external morphological features alone and were previously considered to be conspecific. They  
43 can be differentiated using scanning electron microscopy on the number and shape of maxillary  
44 and premaxillary teeth, life-history traits, and choice of breeding environment (Niemiller et al.  
45 2009, Kraus & Petranka 1989). In addition to their morphological ambiguity, phylogenetic

46 reconstructions using mitochondrial and nuclear sequence data also produced conflicting results  
47 regarding the relationship between *A. texanum* and *A. barbouri* (Niedzwiecki 2005).  
48 Reconstructions based on mitochondrial sequences show that *A. texanum* and *A. barbouri* are  
49 not reciprocally monophyletic; *A. texanum* is recovered as a clade nested within *A. barbouri*  
50 from Tennessee, suggesting that pond-breeding *A. texanum* were more recently derived from a  
51 stream-breeding *A. barbouri* ancestor from Central Tennessee. However, reconstructions based  
52 on two nuclear gene sequences resulted in reciprocally monophyletic clades for the two species,  
53 consistent with a history where *A. barbouri* and *A. texanum* are older independent lineages  
54 derived from a shared common ancestor. Additional sequence data are needed to resolve  
55 unanswered phylogenetic questions as these earlier reconstructions were based on a limited  
56 number of molecular markers (two nuclear and one mitochondrial gene) and representative  
57 outgroups.

58 Mitochondrial evidence also informs on the origins of unisexual Ambystomatid  
59 populations that are common in the Great Lakes region of North America. Unisexual  
60 Ambystomatids exhibit a unique reproductive mode whereby male sperm activates egg  
61 development, but contributes variable amounts of nuclear genetic material depending on  
62 compatibility with unrelated cytoplasmic DNA (termed kleptogenesis). While the nuclear  
63 genome unisexuals is a mixture of different Ambystomatid species, all known mitochondrial  
64 haplotypes, across their range, nest within *A. barbouri*. Mitochondrial haplotypes are most  
65 closely related to mitochondrial haplotypes found south of the Ohio River, and southwest of the  
66 Kentucky river (Bogart et al. 2007); however, the relationship of Tennessee *A. barbouri* to  
67 unisexual Ambystomatids has not been explored.

68           At a finer scale, uncertainties also exist regarding the relationship among isolated  
69 populations of *A. barbouri* in Tennessee and discontinuous populations in Kentucky, Indiana,  
70 Ohio, and West Virginia. Phylogenetic reconstructions of *A. barbouri* populations based on  
71 mitochondrial sequence data (913 bp) from the D-loop and an adjacent intergenic spacer suggest  
72 that Tennessee *A. barbouri* populations are both ecologically and genetically distinct from more  
73 northern populations (Eastman et al. 2009). At hatching, *A. barbouri* from Tennessee were  
74 smaller and less developed than individuals from Kentucky (Niedzwiecki 2005). Also,  
75 laboratory behavioral assays show that Tennessee *A. barbouri* were similar to western Kentucky  
76 individuals, but less active than individuals from northern populations (Niedzwiecki 2005).  
77 These differences were supported by genetic data; phylogenetic reconstructions recovered  
78 mitochondrial haplotypes from Tennessee as monophyletic and basal to haplotypes from  
79 Kentucky, Ohio, and West Virginia (Eastman et al. 2009). These results support an early  
80 divergence of Tennessee populations and raise questions regarding the geographic origin of *A.*  
81 *barbouri*. However, conclusions from this study were limited as these reconstructions are based  
82 on a single mitochondrial gene from only three individuals from a few populations within a  
83 kilometer of each other in Rutherford County.

84           Observations from field surveys suggest that *A. barbouri* populations in Tennessee are  
85 in decline, and the accompanying loss of genetic variation in small populations further threatens  
86 the long-term persistence of this species (Niemiller et al. 2006). Maintenance of genetic  
87 variation is a fundamental priority for conservation planning and requires information regarding  
88 the partitioning of genetic variation within and between isolated populations. Data on patterns of  
89 genetic variation in Tennessee populations of *A. barbouri* are limited to a handful of  
90 mitochondrial and nuclear sequences used for phylogenetic studies (Eastman et al. 2009);

91 Niedzweicki 2005). Genome-wide surveys of genetic variation from fine-scale population  
92 sampling across the state are critical for assessing genetic variation within populations,  
93 establishing units of conservation and maintaining historical patterns of gene flow between  
94 populations to improve the outcome of recovery efforts (Shaffer et al. 1996).

95 Here we investigate patterns of genetic variation within and among populations of  
96 Tennessee *A. barbouri* as well as the taxonomic relationship between *A. barbouri* and *A.*  
97 *texanum* in order to prioritize conservation needs and inform management practices aimed at  
98 maximizing long-term persistence of this species. Mitochondrial sequence data and genome  
99 wide SNP genotypes were used to (1) investigate the phylogenetic relationship between *A.*  
100 *barbouri* and *A. texanum*, (2) review the taxonomic relationship of disjunct populations of *A.*  
101 *barbouri* in Tennessee relative to northern populations, (3) evaluate patterns of genetic  
102 differentiation between geographically isolated populations of *A. barbouri* within the state of  
103 Tennessee and (4) estimate within-population genetic variation and examine demographic  
104 history of Tennessee *A. barbouri*. Taxonomic relationships, units of conservation, and  
105 geographic partitioning of genetic variation are discussed in the context of establishing  
106 conservation priorities and designing effective management strategies for this species.

## 107 **Methods**

### 108 *Tissue Collection and DNA Extraction.*

109 Tissue samples of *A. barbouri* in the form of adult tail clips, eggs, and whole larvae were  
110 obtained from field surveys or from collaborators (Fig. 2, Table 1). Historical and predicted sites  
111 of *A. barbouri* were surveyed from January 2018 to March 2018 and again from November 2018  
112 to March 2019, coinciding with timing of oviposition as reported by Niemiller et al. (2009). At  
113 each site, *A. barbouri* adults and eggs were collected by turning over cover objects within and

114 near seasonal streams. Additionally, pools were searched for free-swimming larvae; only one  
115 larva was sampled from any single pool to avoid sampling related individuals from the same  
116 clutch. A total of 235 individuals were included for genetic analysis. Samples included 225  
117 individuals from 13 populations of *A. barbouri* in Tennessee spanning six counties in the  
118 Nashville Basin: Bedford County (B6), Davidson County (D3), Rutherford County (R1, R7, and  
119 R9), Sumner County (S2, S5, S7, S8), Wilson County (W1, W3, and W4), and Williamson  
120 County (Wil2). A total of five *A. texanum* individuals were sampled; these included four  
121 individuals from (Arnold Airforce Base, AAFB) and one from Craighead Co., Arkansas (AKT1).  
122 Outgroups included two *A. mabeei* (North Carolina), two *A. maculatum* (AAFB), and one *A.*  
123 *talpoideum* (AAFB).

124 DNA was extracted from tail clips, eggs, and larvae using the EZNA Tissue DNA Mini  
125 kit (OMEGA BIO-TEK) following the manufacturer's protocol, except that DNA was eluted in  
126 water. Approximately 1200 bp of the mitochondrial D-loop was targeted for PCR amplification  
127 using primers developed by Shaffer and McKnight (1996; Table 2). The mitochondrial D-loop  
128 has been shown to be informative for evaluating population structure and species relationships  
129 within the genus *Ambystoma* (Bogart et al. 2007; Charney et al. 2014; Church et al.; 2003;  
130 Shaffer & McKnight 1996; Zamudio & Savage 2003). Conditions for polymerase chain reaction  
131 (PCR) were as follows: initial denaturation step of 2 minutes at 95°C, followed by 35 cycles of  
132 15s at 95°C, 15s at 53°C, and 90s at 72°C. This program ended with a final extension of 10 min.  
133 at 72°C. Amplified PCR product was cleaned prior to cycle sequencing by exonuclease I/shrimp  
134 alkaline phosphatase (New England Biolabs) and used for bi-directional Sanger sequencing on  
135 an ABI 3730 automated sequencer (MCLAB). Sequence chromatograms were imported and  
136 visualized using SEQUENCHER 5.2 (Gene Codes Corporation). Sequences were aligned using

137 ClustalW Multiple Alignment option (Thompson et al. 2003) as implemented in Bioedit (Hall  
138 1999).

### 139 *Phylogenetic Reconstructions for Mitochondrial Haplotypes*

140 Phylogenetic reconstructions were estimated for all unique mitochondrial D-loop  
141 haplotypes and an additional 53 *A. barbouri*, 83 unisexual Ambystomatids and 27 *A. texanum*  
142 sequences obtained from Genbank. Both maximum likelihood (ML) and Bayesian optimality  
143 criteria were used for phylogenetic analyses. Maximum-likelihood analyses were performed  
144 using the software RAxML (Stamatakis 2014) on the CIPRES Science Gateway (Miller et al.  
145 2010) under the GTR+G model. Nodal support was estimated using rapid bootstrapping (1000  
146 replicates). Bayesian phylogenetic reconstructions were performed using MrBayes 3.2.1  
147 (Huelsenbeck & Ronquist 2001) also on the CIPRES Science Gateway. The best model of  
148 substitution was selected by Modeltest (Posada & Crandall 1998), implemented in MEGA X  
149 (Kumar et al. 2016) using Bayesian information criterion (BIC). The Markov chain Monte Carlo  
150 (MCMC) algorithm ran for 10,000,000 generations, sampling every 1,000 generations. Two  
151 independent runs were performed and the resulting trees were combined after the deletion of a  
152 burnin (25%). A majority-rule consensus tree was generated and nodal support was estimated by  
153 posterior probabilities.

### 154 *GBS Library Preparation and Sequencing.*

155 A total of 227 individuals were included for GBS sequencing including 201 individuals  
156 from 12 populations of *A. barbouri* in Tennessee, 17 individuals from five populations of *A.*  
157 *barbouri* in Kentucky, five individuals from two populations of *A. texanum*, and two sampled  
158 outgroups *A. talpoideum* (N=1) and *A. mabeei* (N=1; Table 1). Genotyping-by-Sequencing  
159 libraries were prepared using the restriction enzyme ApeKI following the protocol of Elshire et



160 al. (2011). Genomic DNA was quantified using Quant-iT Picogreen dsDNA Assay Kit (Thermo  
161 Fisher Scientific), and all samples were standardized to between 5-6.5 ng/uL (50-65 ng total  
162 genomic DNA). Extracted DNA was digested with the restriction enzyme ApeKI. Adaptors  
163 containing PCR binding sites and individual barcodes were ligated onto digested DNA.  
164 Barcoded DNA was pooled, and PCR was amplified using primers that bind to the ligated  
165 adaptors (see Elshire et al. 2011 for primer sequences). The resulting PCR products were  
166 cleaned using the Qiagen PCR purification kit and then cleaned again using the AxyPrep Mag  
167 PCR Clean-up kit (Axygen, Big Flats, New York, USA). The distribution of the fragment size in  
168 the PCR product was determined using an Agilent 2100 BioAnalyzer (Agilent Technologies  
169 Inc., Santa Clara, CA, USA). Barcoded libraries were sequenced using the Illumina NextSeq  
170 (Illumina Inc., San Diego, CA, USA) with a 75 bp single end read chemistry.

#### 171 *SNP Discovery and Filtering.*

172 The *Stacks* program *process\_radtags* was used to filter and demultiplex raw reads based  
173 on barcoded sequences (Catchen 2011). We used the seven-step de novo clustering pipeline  
174 ipyrad v. 3.5 (Eaton 2014) to generate and filter SNP datasets used in downstream analyses.  
175 Quality filtering of raw sequence reads converted bases with Phred scores <33 to Ns, reads with  
176 more than 5 Ns were removed. Reads were clustered using a sequence similarity threshold of  
177 90% both within and between sampled individuals, with a minimum read depth of six.  
178 Individuals with fewer than 500,000 reads were excluded from downstream analyses. Loci with  
179 observed heterozygosity ( $H_o$ ) greater than 0.5 were removed to filter out possible paralogs. The  
180 final SNP dataset was then filtered to remove loci deviating from Hardy-Weinberg equilibrium  
181 ( $p < 0.05$ ), loci genotyped in less than 60% of individuals, and SNPs with a minor allele  
182 frequency (MAF) less than 0.01. Only one SNP per tag was retained per locus.

183 *Population Genetic Variation and Effective Population Size*

184           Estimates of within population genetic variation for 12 Tennessee *A. barbouri*  
185 populations were estimated using the R-package DiveRsity v. 1.9.9 (Keenan et al. 2013).  
186 Summary statistics were estimated separately for each population and included the proportion of  
187 SNPs that were polymorphic within each population ( $P$ ), allelic richness ( $A_R$ ), and observed and  
188 expected heterozygosity ( $H_o$  and  $H_e$ ). Estimates of  $P$ ,  $A_R$ ,  $H_o$ , and  $H_e$  were estimated for the  
189 entire SNP dataset and for the subset of SNPs that were polymorphic within each population.

190           Effective population size ( $N_E$ ) was estimated for Tennessee *A. barbouri* populations  
191 using both the linkage disequilibrium (LD) method and the heterozygote-excess method  
192 (Zhdanova & Pudovkin 2008) as implemented in the program  $N_E$ Estimator v2 (Do et al. 2014).  
193 Populations with sample sizes of less than 20 individuals were excluded from analyses as these  
194 datasets did not provide enough signal for reliable  $N_E$  estimation (Nunziata & Weisrock 2018).  
195 The minor allele frequency (MAF) parameter was set at 0.01 and 95% confidence intervals were  
196 estimated using the parametric chi-squared method.

197 *Population Structure.*

198           Population pairwise  $F_{ST}$  values were estimated for the all *A. barbouri* populations (Weir  
199 & Cockerman 1984). Hierarchical partitioning of genetic variation across Tennessee populations  
200 of *A. barbouri* was examined using Analysis of Molecular Variances (AMOVA) as implemented  
201 by Arlequin 3.5 (Excoffier & Lischer 2010, Excoffier et al. 1992). Results from phylogenetic  
202 reconstructions based on mitochondrial D-loop haplotypes were used to generate hypotheses  
203 regarding higher-level structuring of populations. Significance of variance components was  
204 determined using 1000 permutations.

205           The optimal number of genetic clusters ( $K$ ) based on genomic SNPs was estimated using  
206 both a multivariate approach and a Bayesian-based assignment method. Discriminant Analysis  
207 of Principal Component (DAPC) was performed using the ‘*adegenet*’ package in *R* (Jombart &  
208 Ahmed 2011, Jombart & Collins 2015). The *find.clusters* function was first used to identify the  
209 optimal value of  $K$  based on a Bayesian Information Criterion (BIC) process. The optimal  
210 number of principal components was determined using the function *a.score*. The optimal  $K$  was  
211 then used to perform a DAPC analysis to describe the relationship between the genetic clusters  
212 and individual membership probabilities were assessed using the function *compoplot*. DAPC  
213 analysis was performed on three hierarchical datasets; these included 1) 12 populations of *A.*  
214 *barbouri* in Tennessee, 2) all sampled Tennessee and Kentucky *A. barbouri* populations and 3)  
215 all *A. barbouri* populations and four *A. texanum* individuals from AAFB.

216           Bayesian assignment tests were performed on Tennessee *A. barbouri* populations using  
217 the program STRUCTURE 2.3.4 (Pritchard et al. 2003). Kentucky *A. barbouri* populations were  
218 not included in assignment analyses due to small sample sizes at these sites. Values of  $K$   
219 (number of populations) ranged from 1 to 12 populations with 20 replicate runs per value of  $K$ ;  
220 MCMC simulations were performed for a burn-in of 250,000 iterations and an additional  
221 1,000,000 iterations were retained for the final analysis. Results were summarized using the  
222 software package CLUMPAK (Kopelman et al. 2015). The optimal number of groups ( $K$ ) was  
223 determined using the Delta- $K$  method (Evanno et al. 2005) as implemented in STRUCTURE  
224 HARVESTER v0.6.94 application (Earl & VonHoldt 2012). The Distruct (1.1) application in  
225 CLUMPAK (Kopelman et al. 2015) was used to produce the final barplots.

226 *Multispecies Coalescent using BPP*

227 A multispecies coalescent (MSC) model was used to examine taxonomic boundaries,  
228 estimate species trees, and estimate population divergence times ( $t$  = years before present) as  
229 implemented in the software BPP v. 4.4 (Yang 2015). Input datasets were formatted as full-  
230 length sequence alignments from our GBS sequencing and included all *A. barbouri* and *A.*  
231 *texanum* populations. Loci represented by fewer than 100 individuals were removed from the  
232 analysis. Joint species-delimitation and species-tree reconstructions were performed using the  
233 A11 model, where individuals were assigned to sampled populations. Run parameters were as  
234 follows: uniform rooted trees were used as the species model prior, the theta prior ( $\theta = 4N_E\mu$ )  
235 was assigned a gamma distribution with  $\alpha=3$  and  $\beta=0.04$  and the prior for tau ( $\tau=t\mu$ ) was gamma  
236 distributed with  $\alpha=3$  and  $\beta=0.2$ . Three independent MCMC runs were implemented, each with a  
237 burn-in of 5,000, a sample frequency of 10 and a total of 50,000 iterations. Species delimitation  
238 and species-tree topologies with the highest posterior probabilities from the A11 runs were used  
239 as input for the A00 analyses. The A00 model estimates divergence time parameters and long-  
240 term  $N_E$ , assuming fixed species assignments and a fixed species tree. The priors for A00 were  
241 the same as priors used for the A11 model. Three independent runs were also performed for the  
242 A00 analysis, each with a burn-in of 5,000, a sample frequency of 10 and a total of 50,000  
243 iterations. MCMC chains were pooled and absolute estimates of  $\tau$  were converted to years before  
244 present (YBP) in the BPPR using the genome wide mutation rate estimate for the vertebrate  
245 nuclear genome where  $\mu= 1.21 \times 10^{-9}$  (Allio et al. 2019, Reis & Yang 2019).

## 246 **Results**

### 247 *Mitochondrial Sequencing.*

248 Sanger sequencing of the mitochondrial D-loop resulted in an ~1100 bp sequence  
249 alignment in the 81 individuals selected for sequencing. A total of 60 unique haplotypes were

250 identified from the newly sequenced individuals, 39 haplotypes were identified from *A. barbouri*  
251 populations sampled in Tennessee (See Supplement 1 for Genbank Accessions) and 15  
252 haplotypes were identified from populations sampled in Kentucky. An additional six haplotypes  
253 were sequenced from outgroups. The final alignment contained 126 variable sites (excluding  
254 outgroups); of these, 120 sites were parsimony informative. No haplotypes were shared across  
255 multiple populations.

### 256 *Phylogenetic Reconstructions.*

257 Both Bayesian and ML phylogenetic reconstructions of mitochondrial D-loop haplotypes  
258 identified six major clades across *A. barbouri* and *A. texanum* haplotypes (Fig. 3). *Clade I*  
259 included all haplotypes belonging to the unisexual lineage of *A. barbouri* with 100% posterior  
260 probability (pp) and 100% bootstrap support (bs) for Bayesian and ML analysis, respectively. In  
261 *Clade II*, *A. barbouri* from Wilson Co. (populations W1, W3, and W4) and Davidson Co.  
262 (population D3) formed a monophyletic clade that also includes Kentucky *A. barbouri*  
263 populations from southwest of the Kentucky River (pp = 100, bs = 95%). *Clade I* and *Clade II*  
264 were recovered as sister clades in both analyses with strong support (pp = 100, bs = 99%). *Clade*  
265 *III* included all *A. texanum* individuals (pp = 99, bs = 71) with the exception of a single *A.*  
266 *texanum* haplotype obtained from Genbank (ID EU980569, collected from Lawrence KA); this  
267 sequence is recovered as basal to *Clade III* in both ML and Bayesian analyses. *Clade IV* groups  
268 with *Clade III* and included Tennessee *A. barbouri* individuals from Rutherford Co. (populations  
269 R1, R7, and R9), Bedford Co. (B6) and Williamson Co.; pp = 100, bs = 71%). *Clade V* included  
270 all Kentucky individuals from populations NE of the Kentucky River, Ohio and Indiana (pp =  
271 100, bs = 86%). Finally, *Clade VI* is sister to *Clade V* and included all Tennessee *A. barbouri*  
272 from Sumner Co. (populations S2, S5, S7, and S8), a single haplotype from Wilson population

273 W3 and three haplotypes sequenced from Rutherford population R7 (pp = 100, bs = 99%). On a  
274 larger scale, all *A. barbouri* and *A. texanum* are part of the same well-supported monophyletic  
275 group in both analyses (pp = 100, bs = 100%), such that all *A. texanum* haplotypes are nested  
276 within *A. barbouri*.

#### 277 *GBS sequencing.*

278 The average number of retained sequence reads per individual generated from  
279 sequencing of GBS libraries was 5,780,366; 220 individuals were retained after removal of low  
280 coverage individuals (defined as < 500,000 total reads). A total of 1,558,844 loci were  
281 recovered from the de novo assembly in ipyrad and 440,629 loci were retained after filtering.  
282 Additional filtering for SNPs (i.e. filtering for low representation, HWE, MAF, and max  
283 heterozygosity) recovered 1,169 SNPs for the dataset that included only Tennessee *A. barbouri*,  
284 516 SNPs in the dataset that included all sampled *A. barbouri* populations in Tennessee and  
285 Kentucky, and 500 SNPs in the dataset that included all *A. barbouri* and *A. texanum* populations.

#### 286 *Within Population Genetic Variation*

287 Much of the genetic variation within our SNP dataset was in the form of fixed differences  
288 between populations (Table 3). The proportion of SNPs that were polymorphic within  
289 populations ranged from 0.045 (W3/Wil2) to 0.267 (S7). When only polymorphic loci were  
290 considered, the Will2 population had the highest estimates of  $H_o$  and  $H_e$ ; however, this  
291 population had a low proportion of polymorphic SNPs overall. Rutherford County populations  
292 (R1/R7) had the lowest estimates of  $H_o$  and  $H_e$ , when considering only polymorphic loci and for  
293 the entire SNP dataset.

#### 294 *Effective Population Size*

295 Estimates of effective population size ( $N_E$ ) were generated for five populations with  
296 adequate sampling ( $N \geq 20$ ), including S7, S8, R1, R7, and D3 (Table 4). Results from LD  
297 analyses ranged from  $N_E = 15$  (R1) to  $N_E = 108$  (108) (S8); the upper confidence interval for S8  
298 was  $\infty$ , indicating low signal for this dataset. Results from the heterozygote excess method were  
299 inconclusive ( $\infty$ ) for two of the five analyzed populations. Estimates from the remaining three  
300 populations ranged from 24 (D3) to 406 (S7); however, CIs included  $\infty$  for two of these  
301 estimates (S7 and S8).

### 302 *Population Structure.*

303 Pairwise  $F_{ST}$  estimates for *A. barbouri* populations within Tennessee were geographically  
304 structured in a hierarchical fashion (Table 5). Overall,  $F_{ST}$  values averaged 0.375 and ranged  
305 from no differentiation ( $F_{ST} = 0$ ) to highly differentiated ( $F_{ST} = 0.725$ , S5/R1). In general,  
306 populations north of the Cumberland River (S2, S5, S7, and S8) showed evidence of long-term  
307 isolation from populations south of the Cumberland. Pairwise  $F_{ST}$  estimates comparing  
308 populations north and south of the Cumberland averaged 0.637, while  $F_{ST}$  estimates among  
309 Tennessee populations north of the Cumberland averaged only 0.043. Populations south of the  
310 Cumberland were further structured; populations in Wilson and Davidson Counties (W1, W3,  
311 W4, and D3) were diverged from populations further south in Williamson, Rutherford and  
312 Bedford counties. Estimates of pairwise  $F_{ST}$  comparing populations within Wilson/Davidson  
313 averaged 0.121 and within Williamson, Rutherford and Bedford Counties averaged 0.070, while  
314 between group pairwise  $F_{ST}$  values were much higher, averaging 0.300.

315 The three monophyletic clades of Tennessee *A. barbouri* recovered from mitochondrial  
316 phylogenetic reconstructions were further examined using genome-wide SNP genotypes in an  
317 AMOVA framework (Table 6). The majority of variance in SNP genotypes could be attributed

318 to differences between the three clades (63.64%). Differences between populations within clades  
319 only accounted for 2.09% of the total molecular variance. Differences between individuals  
320 accounted for the remaining 34.27% of variance in SNP genotypes.

321 Results of BIC for DAPC analysis suggested that three genetic clusters ( $K=3$ ) best  
322 represented genetic variation among populations sampled within Tennessee (Fig. 4A, Supp 2).  
323 Membership of each cluster was geographically partitioned and consisted of a northern cluster  
324 that included populations from Sumner County, a central cluster comprised of individuals from  
325 Wilson and Davidson Counties, and a southern cluster that represented Bedford, Rutherford, and  
326 Williamson County populations. Membership probabilities and DAPC plots indicated some  
327 degree of admixture between the central and southern clusters, but no admixture within the  
328 northern cluster (Supplement 2). A separate analysis that included Tennessee *A. barbouri* and  
329 the five sampled populations from Kentucky also resulted in three genetic clusters (Fig 4B).  
330 Kentucky populations of *A. barbouri* were isolated from populations in Tennessee. Central and  
331 southern populations were assigned to the same cluster and populations in Sumner county were  
332 assigned to the third cluster. When *A. texanum* individuals were included in a third analysis,  
333 results of the BIC analysis indicated the number of genetic clusters was five (Fig. 4C).  
334 Tennessee populations were assigned to northern, central, and southern clusters and scatter plots  
335 showed Tennessee populations to be tightly grouped with the fourth cluster that included all  
336 Kentucky populations. All *A. texanum* individuals formed the fifth cluster that was well  
337 separated from all *A. barbouri* individuals.

338 Analysis of Bayesian assignment tests for Tennessee populations of *A. barbouri* were  
339 consistent with results from DAPC analysis that suggested the presence of three geographically  
340 partitioned genetic clusters within the state (Fig. 5). The optimal value of  $K$ , as determined by



341 the Delta K method, indicated four genetic clusters; however, increasing K from 2 to 3 did not  
342 change population assignments. Assignment plots for K=2-3 separated northern populations in  
343 Sumner County from central and southern populations. When K was increased to four,  
344 populations from Davidson and Wilson Counties were separated from southern populations in  
345 Bedford, Rutherford and Williamson Counties. Increasing the value of K to 5 increased the level  
346 of admixture, but did not result in geographically meaningful partitions.

#### 347 *Multispecies Coalescent Analyses.*

348 A total of 988 loci were retained for the MSC analyses performed by BPP. All three A11  
349 runs recovered the same taxonomic groups and species tree topology with the highest posterior  
350 probability. Out of 18 sampled populations, 14 populations were genetically distinct. Within  
351 Tennessee, *A. texanum* and all *A. barbouri* populations, with the exception of R1/R7, were  
352 identified as distinct groups (Fig. 6). Kentucky *A. barbouri* populations were split into two  
353 groups; populations FC, JC, RR, and SL were grouped together and the SW populations was its  
354 own genetic group. The separation of individual populations in this analysis does not indicate  
355 that each population warrants recognition at the species-level as simulations have shown that  
356 BPP will split groups at the population-level when many loci are analyzed (Leach et al. 2019).

357 The A11 species tree reconstruction with the highest posterior identified the same  
358 Tennessee clades recovered in our mitochondrial gene trees with the exception of the placement  
359 of *A. texanum*. In the species tree, *A. texanum* was basal to all populations of *A. barbouri* in  
360 Tennessee and Kentucky. The estimated divergence time (A00 analysis) between *A. texanum* and  
361 *A. barbouri* was 1.6 million YBP. All Sumner *A. barbouri* formed a monophyletic group with  
362 Kentucky populations as a monophyletic sister group. Divergence time estimates indicated that  
363 Sumner populations and Kentucky populations shared a common ancestor < 500,000 YBP. All

364 *A. barbouri* populations south of the Cumberland River were monophyletic (TMRCA 260,000  
365 YBP) and were further split into two groups that corresponded to clades recovered in the  
366 mitochondrial gene tree. Davidson and Wilson populations were recovered together in the first  
367 group (mitochondrial Clade II) and Rutherford, Bedford, and Williamson populations  
368 (mitochondrial Clade IV) formed the second group.

## 369 **Discussion**

370 Patterns of genomic variation and taxonomic relationships identified here have important  
371 implications for developing management strategies aimed at the long-term conservation of *A.*  
372 *barbouri*. Despite the documented decline of *A. barbouri* populations in the Nashville Basin,  
373 results from GBS-derived SNP genotyping indicate that estimates of genetic variation in extant  
374 populations of Tennessee *A. barbouri* are similar to SNP-based datasets examined from other  
375 ambystomatids. Partitioning of genetic variation between Tennessee populations suggests that  
376 hydrogeography of the Nashville Basin has shaped patterns of gene flow. Both mtDNA and  
377 genomic SNP genotypes showed similar patterns with respect to population structure within the  
378 state of Tennessee that should be used to inform the designation of units of conservation. Our  
379 results also reveal a complex history of Tennessee *A. barbouri* with more northern populations  
380 and with its sister species *A. texanum*. Despite marked differences in phylogenetic  
381 reconstructions based on mtDNA sequencing and nuclear genotypes, collectively these results  
382 indicate that Tennessee is genetically unique from Northern *A. barbouri* and *A. texanum*.

### 383 *Genetic Variation within Populations.*

384 Loss of genetic variation resulting from rapid population decline threatens the long-term  
385 success of conservation efforts due to loss of adaptive potential and fixation of deleterious alleles  
386 (Kardos et al. 2021). For *A. barbouri* populations in the Nashville Basin, maintenance of

387 adaptive genetic variation is particularly critical as these populations are faced with habitat  
388 alteration by urbanization in addition to climate change (Schmidt et al. 2021). Evaluating the  
389 genetic health of populations is valuable for management and conservation planning; however,  
390 the interpretation of genetic variation estimates from SNP data is challenging due to the limited  
391 number of comparable studies utilizing reduced-representation methods in salamanders.  
392 Heterozygosity estimates obtained here are similar to estimates obtained in the handful of  
393 published SNP-based genetic studies. In a recent survey of SNPs from ddRAD sequencing,  
394 estimates of  $H_O$  ranged from 0.165 to 0.269 for populations of the mole salamander (*A.*  
395 *talpoideum*) and were slightly higher for populations of the marbled salamander (*A. opacum*;  
396 0.207 - 0.298; Nunziata et al. 2017). Another SNP-based survey examined the effects of land  
397 use on genetic variation in the northern two-lined salamander (*Eurycea bislineata*). Fusco et al.  
398 (2020) reported nearly identical estimates of  $H_O$  from urban, suburban and rural salamander  
399 populations ( $H_O$ = 0.265, 0.278 and 0.275, respectively) and concluded that genetic variation had  
400 been maintained, despite habitat disturbance. However, estimates of heterozygosity may not be  
401 directly comparable across independent studies as filtering parameters in bioinformatic pipelines  
402 can influence population genetic summary statistics. Stringent filtering criteria may  
403 preferentially retain loci in conserved regions of the genome and downwardly bias estimates of  
404 genetic variation (Huang & Knowles 2014). There have been previous population genetic studies  
405 in *A. texanum* and *A. barbouri* populations based on microsatellite markers. Micheletti and  
406 Storfer (2017) estimated genetic variation at 11 microsatellite loci in 76 populations of *A.*  
407 *barbouri* distributed throughout Kentucky, Ohio, and Indiana; the average  $H_e$  from their study  
408 ranged from 0.67 – 0.81, respectively. Few conclusions can be made by comparing results from  
409 these prior microsatellites studies to our results based on SNP genotypes; microsatellites are

410 known to have a much higher rate of mutation than nucleotide substitutions, increasing the  
411 expected amount of allelic diversity for a given population size (Haasl & Payseur 2011).

412 *Effective population size.*

413 A reduction in estimates of contemporary effective population size ( $N_E$ ) may also signal a  
414 decline in the genetic health of at-risk populations. Our estimates of  $N_E$  were low ( $N_E$  from the  
415 LD method averaged 58.0 across five populations), but were not unusual for LD-derived  
416 estimates of  $N_E$  in salamanders. Published estimates of  $N_E$  reported for amphibians have  
417 typically been under 100 (Jehle & Arntzen 2002). Effective population size estimates reported  
418 here were similar to values reported for the congeneric endangered California tiger salamander  
419 (*A. californiense*;  $N_E$  values of 11-64; Wang et al. 2011), and for the long-toed salamander (*A.*  
420 *macrodactylum*;  $N_E = 23-207$ ; Funk et al. 1999). In *A. macrodactylum*, Savage et al. (2010)  
421 estimated  $N_E$  for 47 breeding populations and more than half of these estimates were less than  
422 50. Life history factors may provide some explanation for low  $N_E$  in this group as salamanders  
423 often exhibit high variance in reproductive success and larval survival within populations.  
424 Variance in reproductive success will increase relatedness among individuals in a population,  
425 inflating linkage disequilibrium across loci and reducing  $N_E$ .

426 Obtaining robust estimates of  $N_E$  and other demographic parameters in at-risk species can  
427 be challenging due to the sample sizes required for LD detection. Many threatened taxa are  
428 inherently rare and prohibitively difficult to sample in large numbers. For robust estimation of  
429  $N_E$ , it is recommended that sample sizes be greater than 30 for most systems (. When the number  
430 of sampled individuals is much smaller than the effective size, LD-based  $N_E$  estimates can be  
431 downwardly biased and confidence intervals can be large (or infinite) due to inadequate signal in  
432 the dataset (Waples & Do 2010). We limited our  $N_E$  analysis to populations with sample sizes >

433 20 individuals, which left only five populations for  $N_E$  estimation. The infinite upper confidence  
434 interval for our  $N_E$  estimate in population Sumner 8 was likely due to an inadequate sample size  
435 for this population ( $N=21$ ).

#### 436 *Phylogenetic Reconstructions and Population Structure*

437 Mitochondrial gene-tree reconstructions suggest a complex biogeographic history for *A.*  
438 *barbouri* in Tennessee that involves populations of unisexual Ambystomatids, *A. texanum* and  
439 populations of *A. barbouri* from the northern core region (Kentucky, Indiana, and Ohio). Our  
440 results support findings by Bogart et al. (2007) demonstrating a monophyletic relationship of  
441 unisexual Ambystomatid mtDNA haplotypes nested within *A. barbouri*. The phylogenetic  
442 reconstruction shown here further details this relationship whereby unisexual Ambystomatids  
443 likely shared a maternal common ancestor with *A. barbouri* populations in Kentucky and  
444 populations from Middle Tennessee. This pattern, coupled with phylogenies based on nuclear  
445 genes, points to a history of repeated hybridization events initiated by an *A. barbouri* maternal  
446 ancestor in the southern portion of its range.

447 With regards to their mitochondrial lineage, *A. texanum* is nested within present-day *A.*  
448 *barbouri*, rendering *A. barbouri* paraphyletic. This phylogenetic pattern contradicts the scenario  
449 proposed by Kraus and Petranka (1989), that stream-dwelling *A. barbouri* descended from the  
450 more widespread pond-breeding *A. texanum*. Species-tree reconstructions based on genome-  
451 wide SNP data are incongruent with relationships recovered from the mitochondrial trees. This  
452 species-tree topology adheres to conventional taxonomic and geographical boundaries (Fig. 6),  
453 where *A. texanum* is a sister-species to all *A. barbouri* populations. The TMRCA for *A. barbouri*  
454 and *A. texanum* based on SNP genotypes was estimated at ~1.6 million YBP making this a  
455 relatively recent split between these ecologically distinct species (Vences et al. 2007).

456 Incongruence between mitochondrial gene trees and reconstruction based on nuclear data are not  
457 uncommon and are often attributed to ancestral lineage sorting, introgression, and/or sex-biased  
458 dispersal (Nichols 2001, Toews & Brelsford 2012). Determining the cause of mitonuclear  
459 discordance would require additional sampling across the distributions of both *A. barbouri* and  
460 *A. texanum*; however, it is relevant to note that recent studies have demonstrated that  
461 hybridization is common across salamander lineages (including the genus *Ambystoma*) and may  
462 facilitate rapid diversification (Patton et al. 2020).

463         The hydrogeography of the Central Basin, together with cyclic glacial movements during  
464 the Pleistocene, may have shaped contemporary patterns of genetic variation in Tennessee  
465 populations of *A. barbouri*. Mitochondrial-based phylogenetic reconstructions and partitioning  
466 of genetic variation at SNP loci (including assignment tests, DAPC analyses, AMOVA, and  
467 MSC reconstructions) identify the same three genetically distinct groups in Tennessee; these  
468 include a northern cluster, a central cluster, and a southern cluster. The Cumberland River  
469 appears to have served as a major barrier to gene flow between the northern and the  
470 central/southern clusters. The central and southern clusters both occur south of the Cumberland  
471 River and are divided by smaller regional drainage patterns. Individuals in the northern and  
472 central clusters occupy the Old Hickory Lake and Lower Stones River watersheds, respectively.  
473 The central cluster is bordered by the Cumberland River to the North and by the East Fork of the  
474 Stones River to the east. The southern cluster includes populations from three watersheds  
475 including the West Fork Stones River Watershed, Upper Duck River Watershed, and Mill Creek  
476 Watershed; the southern cluster (with the exception of the Wil2 population) is bordered by the  
477 Stones River to the north and by the Duck River to the south.

478 Mitochondrial-based phylogenetic reconstructions revealed that Tennessee *A. barbouri*  
479 populations are not monophyletic with respect to northern populations, which may reflect a  
480 history of repeated range expansions from Tennessee into the northern end of *A. barbouri*'s  
481 present day distribution. The estimated timing of divergence between the three Tennessee  
482 clusters falls within the mid-late Pleistocene. Glacial advances during the Pleistocene did not  
483 extend into Kentucky and Tennessee and this region likely served as a refuge for both terrestrial  
484 and aquatic fauna (Jacquemin 2016). As glaciers retreated, populations at the northern limits of  
485 these refugia would have advanced northward into newly habitable territory. These expansions  
486 would have left a genetic signature characterized by reduced genetic variation in the northern  
487 end of their distribution as a result of founder effects. Repeated expansions of *A. barbouri*  
488 northward from Tennessee may explain the polyphyletic relationships of contemporary  
489 Tennessee *A. barbouri* with respect to populations in the north. Specifically, mitochondrial *A.*  
490 *barbouri* populations in northeastern Kentucky, Ohio and Indiana (Clade V) are nested within  
491 Tennessee *A. barbouri* as are mitochondrial haplotypes from Ambystomatid unisexuales and *A.*  
492 *texanum*. Genetic evidence of repeated northward expansions has been reported for the Eastern  
493 Woodrat (*Neotoma floridana*; Hayes & Harrison 1992) and other southeastern fauna (see Hewitt  
494 1995 for review).

#### 495 *Management Implications and Conclusions.*

496 Results from our genomic survey have specific implications for the design of  
497 management and conservation strategies that may improve the long-term persistence of *A.*  
498 *barbouri* in Tennessee. First, patterns of genetic variation in mitochondrial and nuclear genomes  
499 support the assignment of three genetically distinct units for management that warrant the  
500 designation of evolutionary significant units (ESUs), where ESUs are defined as groups of

501 populations that show phylogeographic differentiation for mtDNA haplotypes and divergence in  
502 allele frequencies in nuclear markers (Moritz 1994, 1999). These three units include a Northern  
503 ESU encompassing all Sumner County populations (S2, S5, S7 and S8), a Central ESU that  
504 includes populations from eastern Davidson and Wilson Counties (D3, W1, W3 and W4), and a  
505 Southern ESU that includes populations in Williamson, Rutherford, and Bedford Counties  
506 (Wil2, B6, R1, R7, and R9). Patterns of differentiation between these three groups of  
507 populations suggest a long history of genetic isolation at both mitochondrial and nuclear  
508 markers, such that different groups are likely to possess unique combinations of adaptive genetic  
509 variation and have likely experienced independent evolutionary trajectories.

510        Evolutionarily and phylogenetically distinctive populations contribute disproportionately  
511 to genetic diversity and should be ranked highly in regards to conservation priority.  
512 Geographically peripheral populations are frequently observed to be genetically less-redundant  
513 than more central populations and are more likely to possess potentially adaptive genetic  
514 variation (Volkman et al. 2014). For *A. barbouri*, Tennessee populations are geographically  
515 disjunct from the majority of *A. barbouri* breeding populations (Niemiller et al. 2006) and  
516 occupy the southernmost edge of the species distribution. Results from this study suggest that  
517 Tennessee *A. barbouri* should be prioritized for conservation planning as these populations are  
518 both genetically diverse and evolutionarily distinct from populations in the northern part of their  
519 distribution. The distinctiveness of these populations is further evidenced by observed  
520 differences in reproductive life-history traits, including mean diameter of early stage ovum size  
521 and number of eggs per clutch (Niemiller et al. 2009). Prioritizing peripheral populations with  
522 adaptive genetic variation and evolutionary potential is even more critical when considering  
523 environmental challenges that accompany climate change. Amphibians in general are very



524 sensitive to climate change as their reproductive life histories are linked to temperature and  
525 precipitation (Corn 2005). However, there is evidence that populations at the warm-range edge  
526 of their distribution are more resilient (Razgour et al. 2019). Protection of *A. barbouri* breeding  
527 sites in Tennessee may be instrumental to ensuring the long-term viability of this species as a  
528 whole.

### 529 **Acknowledgments**

530 We thank Tennessee Wildlife Resources Agency (TWRA) for providing funding to  
531 support this work. Ryan Hanscom assisted with sample collections. Joanna Bellan assisted with  
532 mitochondrial sequencing and data analysis. Andrea Drayer provided *A. barbouri* tissue samples  
533 from Kentucky populations. We also thank Kristin Womble for producing the map in Figure 2.

534

535  
536  
537  
538  
539  
540  
541  
542  
543  
544  
545  
546  
547  
548  
549  
550  
551  
552  
553  
554  
555

## References

- Allio R, Donega S, Galtier N, Nabholz B. Large variation in the ratio of mitochondrial to nuclear mutation rate across animals: implications for genetic diversity and the use of mitochondrial DNA as a molecular marker. *Mol. Biol. Evol.* 2017; 34(11):2762-2772.
- Anderson MA, Campbell JR, Carey AN, Dodge DR, Johnston RA, Mattison ER, Seddon RJ, Singer NL, Miller BT. Population survey of the streamside salamander in the Nashville Basin of Tennessee. *Southeast Nat.* 2017; 13(1):101–107.
- Toews DP, Brelsford A. The biogeography of mitochondrial and nuclear discordance in animals. *Molecular ecology.* 2012; 21(16):3907-30.
- Bogart JP, Bi K, Fu J, Noble DW, Niedzwiecki, J. Unisexual salamanders (genus *Ambystoma*) present a new reproductive mode for eukaryotes. *Genome* 2007; 50(2):119–136.
- Catchen JM, Amores A, Hohenlohe P, Cresko W, Postlethwait JH. *Stacks*: building and genotyping loci *de novo* from short-read sequences. *G3-Genes Genom Genet* 2011; 1(3):171–182.
- Charney ND, Ireland AT, Bettencourt BR. Mapping genotype distributions in the unisexual *Ambystoma* complex. *J Herpetol* 2014; 48(2):210–219.
- Church SA, Kraus JM, Mitchell JC, Church DR, Taylor DR. Evidence for multiple Pleistocene refugia in the postglacial expansion of the eastern tiger salamander, *Ambystoma tigrinum*. *Evolution* 2003; 57(2):372–383.
- Corn, P.S., 2005. Climate change and amphibians. *Biodiv. Cons.* 2005; 28(1).

556 Do C, Waples RS, Peel D, Macbeth GM, Tillett BJ, Ovenden JR. NeEstimator v2:  
557 re-implementation of software for the estimation of contemporary effective population  
558 size (Ne) from genetic data. *Mol. Ecol. Resour.* 2014; 14(1):209–214.

559 Eaton DAR. PyRAD: Assembly of de novo RADseq loci for phylogenetic analyses.  
560 *Bioinformatics* 2014; 30(13):1844–1849.

561 Earl DA, VonHoldt BM. Structure Harvester: a website and program for visualizing  
562 STRUCTURE output and implementing the Evanno method. *Conserv. Genet. Resour.*  
563 2012; 4(2):359–361.

564 Eastman JM, Niedzwiecki JH, Nadler BP, Storfer A. Duration and consistency of historical  
565 selection are correlated with adaptive trait evolution in the streamside salamander,  
566 *Ambystoma barbouri*. *Evolution* 2009; 63(10):2636–2647.

567 Elshire RJ, Glaubitz JC, Sun Q, Poland JA, Kawamoto K, Buckler ES, Mitchell SE. A  
568 Robust, Simple Genotyping-by-Sequencing (GBS) Approach for High Diversity Species.  
569 *PLoS One.* 2011; 6(5):e19379.

570 Evanno G, Regnaut S, Goudet, J. Detecting the number of clusters of individuals using the  
571 software STRUCTURE: a simulation study. *Mol. Ecol.* 2005; 14:2611–2620.

572 Excoffier L, Smouse PE, Quattro JM. Analysis of molecular variance inferred from metric  
573 distances among DNA haplotypes: application to human mitochondrial DNA restriction  
574 data. *Genetics* 1992; 131(2):479–491.

575 Excoffier L, Lischer HEL. Arlequin suite ver 3.5: a new series of programs to perform  
576 population genetics analyses under Linux and Windows. *Mol. Ecol. Resour.* 2010;  
577 10(3):564–567.

- 578 Funk WC, Tallmon DA, Allendorf FW. Small effective population size in the long-toed  
579 salamander. *Mol Ecol* 1999; 8(10):1633–1640.
- 580 Fusco, N.A., Pehek, E. and Munshi-South, J. Urbanization reduces gene flow but not genetic  
581 diversity of stream salamander populations in the New York City metropolitan area. *Evol.*  
582 *App.* 2010; 14(1): 99-116.
- 583 Geist J. Strategies for the conservation of endangered freshwater pearl mussels  
584 (*Margaritifera margaritifera L.*): a synthesis of conservation genetics and  
585 ecology. *Hydrobiologia* 2010; 644(1):69–88.
- 586 Haasl RJ, Payseur BA Multi-locus inference of population structure: a comparison  
587 between single nucleotide polymorphisms and microsatellites. *Heredity* 2011;  
588 106(1):158–171.
- 589 Hall TA. BioEdit: a user-friendly biological sequence alignment editor and analysis  
590 program for Windows 95/98/NT. *Nucl Acid* 1999; 41:95–98.
- 591 Hare MP. Prospects for nuclear gene phylogeography. *Trends Ecol. Evol.* 2001; 16(12):700–  
592 706. [https://doi.org/10.1016/S0169-5347\(01\)02326-6](https://doi.org/10.1016/S0169-5347(01)02326-6)
- 593 Hartl DL, Clark AG. Principles of population genetics. 1997; Sinauer Assoc. Inc,  
594 Sunderland, Massachusetts.
- 595 Hayes JP, Harrison RG. Variation in mitochondrial DNA and the biogeographic history of  
596 woodrats (*Neotoma*) of the eastern United States. *Systematic Biology.* 1992; 41(3):331-  
597 44.
- 598 Heredia-Bobadilla RL, Monroy-Vilchis O, Zarco-González MM, Martínez-Gómez D,  
599 Mendoza-Martínez GD, Sunny A (2016) Genetic structure and diversity in an isolated

600 population of an endemic mole salamander (*Ambystoma rivulare* Taylor, 1940) of central  
601 Mexico. *Genetica* 2016; 144(6): 689–698.

602 Hewitt GM. Some genetic consequences of ice ages, and their role in divergence and  
603 speciation. *Biological journal of the Linnean Society*. 1996;58(3):247-76.

604 Hewitt G. The genetic legacy of the Quaternary ice ages. *Nature*. 2000; 405(6789):907-13.

605 Huang H, Knowles, LL. Unforeseen consequences of excluding missing data from next-  
606 generation sequences: simulation study of RAD sequences. *Sys. Bio.* 2016; 65(3): 357-  
607 365.

608 Huelsenbeck JP, Ronquist F. MRBAYES: Bayesian inference of phylogenetic trees.  
609 *Bioinformatics* 2001; 17(8): 754-755.

610 Jacquemin SJ, Ebersole JA, Dickinson WC, Ciampaglio CN. Late Pleistocene fishes of the  
611 Tennessee River Basin: an analysis of a late Pleistocene freshwater fish fauna from Bell  
612 Cave (site ACb-2) in Colbert County, Alabama, USA. *PeerJ*. 2016; 2(4):e1648.

613 Jehle R, Arntzen JW. Microsatellite markers in amphibian conservation genetics. *Herpetol J*  
614 2002; 12:1–9.

615 Jombart T, Ahmed I. Adegnet 1.3-1: new tools for the analysis of genome-wide SNP data.  
616 *Bioinformatics* 2011; 27(21): 3070–3071.

617 Jombart T, Collins C. A tutorial for discriminant analysis of principal components (DAPC)  
618 using adegenet 2.0.0. London, Imperial College London, MRC Centre for Outbreak  
619 Analysis and Modelling. 2015.

620 Kardos M, Armstrong E, Fitzpatrick S, Hauser S, Hedrick P, Miller, J., Tallmon, D.A. and  
621 Funk, W.C., 2021. The crucial role of genome-wide genetic variation in conservation.

- 622 Keenan K, McGinnity P, Cross TF, Crozier WW, Prodöhl PA. *diveRsity*: An R package for  
623 the estimation of population genetics parameters and their associated errors, *Methods in*  
624 *Ecology and Evolution*. 2013; 4(8): 782-788.
- 625 Kopelman, Naama M., Jonathan Mayzel, Mattias Jakobsson, Noah A. Rosenberg, and Itay  
626 Mayrose. "Clumpak: a program for identifying clustering modes and packaging  
627 population structure inferences across K." *Molecular ecology resources* 15, no. 5 (2015):  
628 1179-1191.
- 629 Kraus F, Petranka JW. A new sibling species of *Ambystoma* from the Ohio River drainage.  
630 *Copeia* 1989; 94–110.
- 631 Micheletti SJ, Storfer A. An approach for identifying cryptic barriers to gene flow that limit  
632 species' geographic ranges. *Mol Ecol* 2017; 26(2):490–504.
- 633 Miller MA, Pfeiffer W, Schwartz T. The CIPRES science gateway: a community resource for  
634 phylogenetic analyses. In *Proceedings of the 2011 TeraGrid Conference: extreme digital*  
635 *discovery* 2011; Jul 18: 1-8.
- 636 Moritz C. Defining ‘evolutionarily significant units’ for conservation. *Trends Ecol. Evol.*  
637 1994; 9(10):373–375.
- 638 Moritz, C. Conservation units and translocations: strategies for conserving evolutionary  
639 processes. *Hereditas* 1999; 130(3):217–228.
- 640 Niedzwiecki JH. Evolutionary history and hybridization of two mole salamander sister  
641 species from different habitats. Dissertation, University of Kentucky. 2005
- 642 Nichols R. Gene trees and species trees are not the same. *Trends in Ecology & Evolution*.  
643 2001;16(7):358-64.

- 644 Niemiller ML, Glorioso BM, Nicholas C, Phillips J, Rader J, Reed E, Sykes KL, Todd J,  
645 Wyckoff GR, Young EL, Miller BT. Status and distribution of the Streamside  
646 Salamander, *Ambystoma barbouri*, in middle Tennessee. *Am. Midl. Nat.*  
647 2006;156(2):394–399.
- 648 Niemiller ML, Glorioso BM, Nicholas C, Phillips J, Rader J, Reed E, Sykes KL, Todd J,  
649 Wyckoff GR, Young EL, Miller BT. Notes on the reproduction of the Streamside  
650 Salamander, *Ambystoma barbouri*, from Rutherford County, Tennessee. *Southeast Nat.*  
651 2009; 8(1):37–44.
- 652 Nunziata SO, Lance SL, Scott DE, Lemmon EM, Weisrock DW. Genomic data detect  
653 corresponding signatures of population size change on an ecological time scale in two  
654 salamander species. *Mol. Ecol.* 2017 26(4):1060–1074.
- 655 Nunziata SO, Weisrock DW Estimation of contemporary effective population size and  
656 population declines using RAD sequence data. *Heredity* 2018; 120(3): 196-207.
- 657 Patton AH, Margres MJ, Epstein B, Eastman J, Harmon LJ, Storfer A. Hybridizing  
658 salamanders experience accelerated diversification. *Scientific reports.* 2020 Apr  
659 16;10(1):1-2.
- 660 Posada D, Crandall KA. Modeltest: testing the model of DNA substitution. *Bioinformatics*  
661 (Oxford, England) 1998; 14(9):817–818.
- 662 Pritchard JK, Wen W, Falush D. Documentation for STRUCTURE software: Version 2.  
663 Department of Human Genetics, University of Chicago, Chicago. 2003
- 664 Razgour O, Forester B, Taggart JB, Bekaert M, Juste J, Ibáñez C, Puechmaille, SJ, Novella-  
665 Fernandez R, Alberdi A, Manel S. Considering adaptive genetic variation in climate

666 change vulnerability assessment reduces species range loss projections. Proc Nat Acad  
667 Sci 2019.; 116(21):10418–10423.

668 Reis M and Yang Z. In: Anisimova M (ed.) Evolutionary Genomics. Methods in Molecular  
669 Biology, vol 1910. Humana, New York, NY. 2019

670 Savage WK, Fremier AK, Bradley Shaffer H. Landscape genetics of alpine Sierra Nevada  
671 salamanders reveal extreme population subdivision in space and time. Mol. Ecol. 2010  
672 19(16):3301–3314.

673 Schmidt C, Garroway CJ. The population genetics of urban and rural amphibians in North  
674 America. Mol. Ecol. 2021

675 Scott AF, Miller BT, Brown M, Petranka JW. Geographic distribution: *Ambystoma barbouri*.  
676 Herpetol. Rev. 1997; 28:155.

677 Shaffer HB, McKnight ML. The polytypic species revisited: genetic differentiation and  
678 molecular phylogenetics of the tiger salamander *Ambystoma tigrinum* (Amphibia:  
679 Caudata) complex. Evolution 1996; 50(1):417–433.

680 Tennessee Wildlife Resources Agency Rules of Biodiversity. Rules and Regulations for in  
681 Need of Management, Threatened, and Endangered Species. Chapter 1660-01-32. 2018.

682 Thompson JD, Gibson TJ, Higgins DG. Multiple sequence alignment using ClustalW and  
683 ClustalX. Curr. Protoc. Bioinformatics 2003; (1):2–3.

684 Vences, M. and Wake, D.B., 2007. Speciation, species boundaries and phylogeography of  
685 amphibians. Amph. Biol.; 2007: 2613-671.

686 Volkmann L, Martyn I, Moulton V, Spillner A, Mooers AO (2014) Prioritizing populations  
687 for conservation using phylogenetic networks. PLoS One 2014; 9(2):e88945.



- 688 Waples RS, Do C (2008) LDNE: a program for estimating effective population size from data  
689 on linkage disequilibrium. *Mol. Ecol Res.* 2008; 8: 753–756.
- 690 Wang IJ, Johnson JR, Johnson BB, Shaffer HB (2011) Effective population size is strongly  
691 correlated with breeding pond size in the endangered California tiger salamander,  
692 *Ambystoma californiense*. *Conserv. Genet.* 2011; 12(4):911–920.
- 693 Withers DI, Condict K, McCoy R. A Guide to the Rare Animals of Tennessee. Division of  
694 Natural Areas, Tennessee Department of Environment and Conservation, Nashville,  
695 Tennessee. 2009
- 696 Yang Z. The BPP program for species tree estimation and species delimitation. *Current*  
697 *Zoology.* 2015; 61(5):854-65.
- 698 Zamudio KR, Savage WK. Historical isolation, range expansion, and secondary contact of  
699 two highly divergent mitochondrial lineages in spotted salamanders (*Ambystoma*  
700 *maculatum*). *Evolution* 2003; 57(7):1631–1652.

701 **Table 1.** Population IDs, sample sizes for mtDNA/GBS analyses, and map coordinates for all populations.  
 702 Population IDs for *A. barbouri* collections correspond to map locations in Figure 1. For outgroup samples, AAFB  
 703 denotes Arnold Air Force Base and AKT1 denotes *A. texanum* from Arkansas. Population IDs by county are as  
 704 follows: Bedford County (B6), Davidson County (D3), Rutherford County (R1, R7, and R9), Sumner County (S2,  
 705 S5, S7, and S8), Wilson County (W1, W3, and W4), and Williamson County (Wil2).

706

| 707 | Population ID (Map ID)                   | Sample Size<br>mtDNA/GBS | Latitude    | Longitude  |
|-----|------------------------------------------|--------------------------|-------------|------------|
| 708 | <u><i>A. barbouri</i> - Tennessee</u>    |                          |             |            |
|     | Sumner 2 (S2)                            | 3/--                     | 36.336487   | -86.502042 |
| 709 | Sumner 5 (S5)                            | 3/11                     | 36.329443   | -86.570217 |
|     | Sumner 7 (S7)                            | 5/37                     | 36.363339   | -86.537930 |
| 710 | Sumner 8 (S8)                            | 6/22                     | 36.367510   | -86.591100 |
|     | Davidson 3 (D3)                          | 3/29                     | 36.100821   | -86.535713 |
| 711 | Wilson 1 (W1)                            | 5/15                     | 36.040205   | -86.321052 |
|     | Wilson 3 (W3)                            | 4/12                     | 36.093415   | -86.372530 |
| 712 | Wilson 4 (W4)                            | 3/6                      | 36.093249   | -86.398001 |
|     | Williamson 2 (Wil2)                      | 3/5                      | 35.950021   | -86.648606 |
| 713 | Rutherford 1 (R1)                        | 3/20                     | 35.719718   | -86.353396 |
|     | Rutherford 7 (R7)                        | 12/28                    | 35.672435   | -86.315247 |
| 714 | Rutherford 9 (R9)                        | 3/11                     | 35.752811   | -86.306184 |
|     | Bedford 6 (B6)                           | 4/8                      | 35.669700   | -86.528800 |
| 715 | <u><i>A. barbouri</i> -<br/>Kentucky</u> |                          |             |            |
| 716 | Kentucky FC (FC)                         | 3/3                      | 37.772370   | -84.569400 |
| 717 | Kentucky (RR)                            | 5/4                      | 37.897710   | -84.393000 |
|     | Kentucky SL (SL)                         | 4/3                      | 38.490100   | -85.359400 |
| 718 | Kentucky SW (SW)                         | 4/5                      | 38.251190   | -84.753400 |
|     | Kentucky JS (JS)                         | 2/2                      | 37.960310   | -84.818100 |
| 719 | <u>Outgroups</u>                         |                          |             |            |
| 720 | <i>A. mabeei</i>                         | 2/ --                    | 33.936860   | -78.567865 |
| 721 | <i>A. maculatum</i> (AAFB)               | 2/ --                    | 35.392500   | -86.099722 |
|     | <i>A. talpoideum</i> (AAFB)              | 1/1                      | 35.392500   | -86.099722 |
| 722 | <i>A. texanum</i> (AAFB)                 | --/4                     | 35.392500   | -86.099722 |
| 723 | <i>A. texanum</i> (AKT1)                 | 1/1                      | 35.828812 - | -90.688313 |

724

725

726 **Table 2.** Primers used for PCR amplification of the mitochondrial D-loop. Primers THR (forward) and 651 (reverse)  
727 were used for initial amplification of entire ~1300 bp. Internal primers 007 (forward), DL3 (reverse), and DL1  
728 (reverse) were used for Sanger sequencing (Shaffer & McKnight, 1996).

729

| <b>Primer Name</b> | <b>Sequence 5'→3'</b>  |
|--------------------|------------------------|
| THR (forward)      | AACATCGATCTTGTAAGTC    |
| 007 (forward)      | GCACCCAAAGCAAAATTCTTG  |
| DL3 (reverse)      | TTCGATCCAATTGATGAATG   |
| DL1 (reverse)      | AATATTGATAATTCAAGCTCCG |
| 651 (reverse)      | GTAAGATTAGGACCAAATCT   |

730

731

732 **Table 3.** Standard measures of genetic diversity for 12 populations of *Ambystoma barbouri* in Tennessee based 586 SNP loci. Summary statistics include the  
 733 average number of individuals genotyped per locus ( $N$ ) and the proportion of SNPs that were polymorphic within each population ( $P$ ). Allelic richness ( $A_R$ ),  
 734 observed heterozygosity ( $H_O$ ), and expected heterozygosity ( $H_e$ ) were calculated for all loci and again for only those loci that were polymorphic within each  
 735 population.

736

| 737 | Population    | N     | P     | All Loci |       |       | Polymorphic Loci |       |       |
|-----|---------------|-------|-------|----------|-------|-------|------------------|-------|-------|
|     |               |       |       | $A_R$    | $H_O$ | $H_e$ | $A_R$            | $H_O$ | $H_e$ |
| 738 | Sumner 5      | 9.58  | 0.108 | 1.042    | 0.018 | 0.020 | 1.460            | 0.170 | 0.154 |
| 739 | Sumner 7      | 22.78 | 0.267 | 1.036    | 0.027 | 0.025 | 1.204            | 0.102 | 0.092 |
| 740 | Sumner 8      | 12.97 | 0.185 | 1.020    | 0.025 | 0.025 | 1.259            | 0.136 | 0.127 |
| 741 | Davidson 3    | 22.02 | 0.192 | 1.041    | 0.018 | 0.016 | 1.243            | 0.094 | 0.083 |
| 742 | Wilson 1      | 7.49  | 0.112 | 0.986    | 0.019 | 0.023 | 1.395            | 0.173 | 0.163 |
| 743 | Wilson 3      | 7.07  | 0.045 | 1.032    | 0.017 | 0.016 | 1.514            | 0.217 | 0.184 |
| 744 | Wilson 4      | 6.79  | 0.089 | 1.049    | 0.019 | 0.020 | 1.602            | 0.210 | 0.220 |
| 745 | Williamson 2  | 4.11  | 0.045 | 1.000    | 0.012 | 0.026 | 1.690            | 0.257 | 0.229 |
| 746 | Rutherford 1  | 16.71 | 0.092 | 1.026    | 0.009 | 0.008 | 1.303            | 0.096 | 0.091 |
| 747 | Rutherford 7  | 23.57 | 0.140 | 1.032    | 0.011 | 0.011 | 1.240            | 0.076 | 0.079 |
| 748 | Rutherford 9  | 7.74  | 0.056 | 1.022    | 0.009 | 0.009 | 1.470            | 0.160 | 0.159 |
| 749 | Bedford 6     | 8.74  | 0.060 | 1.026    | 0.010 | 0.009 | 1.467            | 0.167 | 0.142 |
|     | Average Total | 12.46 | 0.116 | 1.026    | 0.016 | 0.017 | 1.404            | 0.155 | 0.144 |

750 **Table 4.** Estimates of effective population sizes ( $N_E$ ) for five populations of *Ambystoma barbouri* in Tennessee  
751 based on the Linkage Disequilibrium (LD) method and the Heterozygosity Excess Method as performed by  
752  $N_e$ Estimator. The 95% confidence intervals were estimated by the parametric chi-squared method.

| Population   | $N$ | Linkage Disequilibrium |          |          | Heterozygote Excess |          |          |
|--------------|-----|------------------------|----------|----------|---------------------|----------|----------|
|              |     | $N_E$                  | CI Lower | CI Upper | $N_E$               | CI Lower | CI Upper |
| Sumner 7     | 35  | 84.5                   | 51.5     | 207.2    | 406.4               | 20.7     | $\infty$ |
| Sumner 8     | 21  | 107.7                  | 28.8     | $\infty$ | 192.7               | 18.8     | $\infty$ |
| Davidson 3   | 29  | 52.1                   | 33.2     | 106.4    | 24.0                | 13.0     | 182.8    |
| Rutherford 1 | 20  | 14.8                   | 8.7      | 30.1     | $\infty$            | 14.6     | $\infty$ |
| Rutherford 7 | 28  | 30.7                   | 20.9     | 51.6     | $\infty$            | 22.8     | $\infty$ |

753

754

**Table 5.** Population pairwise  $F_{ST}$  estimates averaged across 584 SNP loci for 12 populations of *Ambystoma barbouri* in Tennessee (below diagonal) and significance of  $F_{ST}$  estimates (p-values, below diagonal) estimated from nonparametric permutations of SNP genotypes (100 permutations) as performed by the software Arlequin. \*\* indicates  $p < 0.001$ .

| Populations      | 1     | 2     | 3     | 4     | 5     | 6     | 7     | 8     | 9     | 10    | 11    | 12  |
|------------------|-------|-------|-------|-------|-------|-------|-------|-------|-------|-------|-------|-----|
| 1. Sumner 5      | ---   |       |       |       |       |       |       |       |       |       |       |     |
| 2. Sumner 7      | 0.053 |       |       |       |       |       |       |       |       |       |       |     |
| 3. Sumner 8      | 0.022 | 0.055 |       |       |       |       |       |       |       |       |       |     |
| 4. Davidson 3    | 0.650 | 0.614 | 0.647 |       |       |       |       |       |       |       |       |     |
| 5. Wilson 1      | 0.670 | 0.616 | 0.641 | 0.207 |       |       |       |       |       |       |       |     |
| 6. Wilson 3      | 0.660 | 0.590 | 0.622 | 0.055 | 0.104 |       |       |       |       |       |       |     |
| 7. Wilson 4      | 0.581 | 0.527 | 0.558 | 0.111 | 0.157 | 0.092 |       |       |       |       |       |     |
| 8. Williamson 2  | 0.669 | 0.568 | 0.602 | 0.203 | 0.238 | 0.278 | 0.167 |       |       |       |       |     |
| 9. Rutherford 1  | 0.725 | 0.638 | 0.698 | 0.288 | 0.408 | 0.399 | 0.320 | 0.031 |       |       |       |     |
| 10. Rutherford 7 | 0.704 | 0.637 | 0.687 | 0.276 | 0.234 | 0.322 | 0.239 | 0.077 | 0.127 |       |       |     |
| 11. Rutherford 9 | 0.695 | 0.601 | 0.651 | 0.285 | 0.356 | 0.370 | 0.276 | 0.039 | 0.021 | 0.113 |       |     |
| 12. Bedford 6    | 0.698 | 0.600 | 0.655 | 0.280 | 0.386 | 0.385 | 0.292 | 0.000 | 0.051 | 0.157 | 0.085 | --- |

**Table 6.** Results of hierarchical analyses of molecular variation (AMOVA) for the SNP dataset from 12 populations of *A. barbouri* in Tennessee. Assignment to mitochondrial clades are as follows: Clade II (S5, S7, and S8), Clade IV (D3, W1, W3, and W4), and Clade III (Wil2, R1, R7, R9, B6). Asterisks indicate significance of  $\Phi$  statistics based on 1000 permutations in Arlequin.

| Source of variation                | DF  | Sum of squares | Variance components | Percentage of variation | $\Phi$ -Statistics    |
|------------------------------------|-----|----------------|---------------------|-------------------------|-----------------------|
| Among drainages                    | 2   | 614.5          | 2.30                | 63.60                   | $\phi_{CT} = 0.636^*$ |
| Among populations within drainages | 9   | 31.24          | 0.08                | 2.09                    | $\phi_{SC} = 0.058^*$ |
| Within populations                 | 384 | 476.24         | 1.24                | 44.23                   | $\phi_{ST} = 0.657^*$ |
| Total                              | 395 | 1,121.97       | 3.62                |                         |                       |

**Figure 2.** Map of all surveyed populations of *A. barbouri* in Tennessee and Kentucky. County lines are shown with black borders. Shaded regions indicate major watersheds as depicted in the legend. Tennessee populations are colored by ESU assignment where green circles indicate northern ESU populations, yellow circles indicate central ESU populations, and purple circles indicate southern ESU populations.

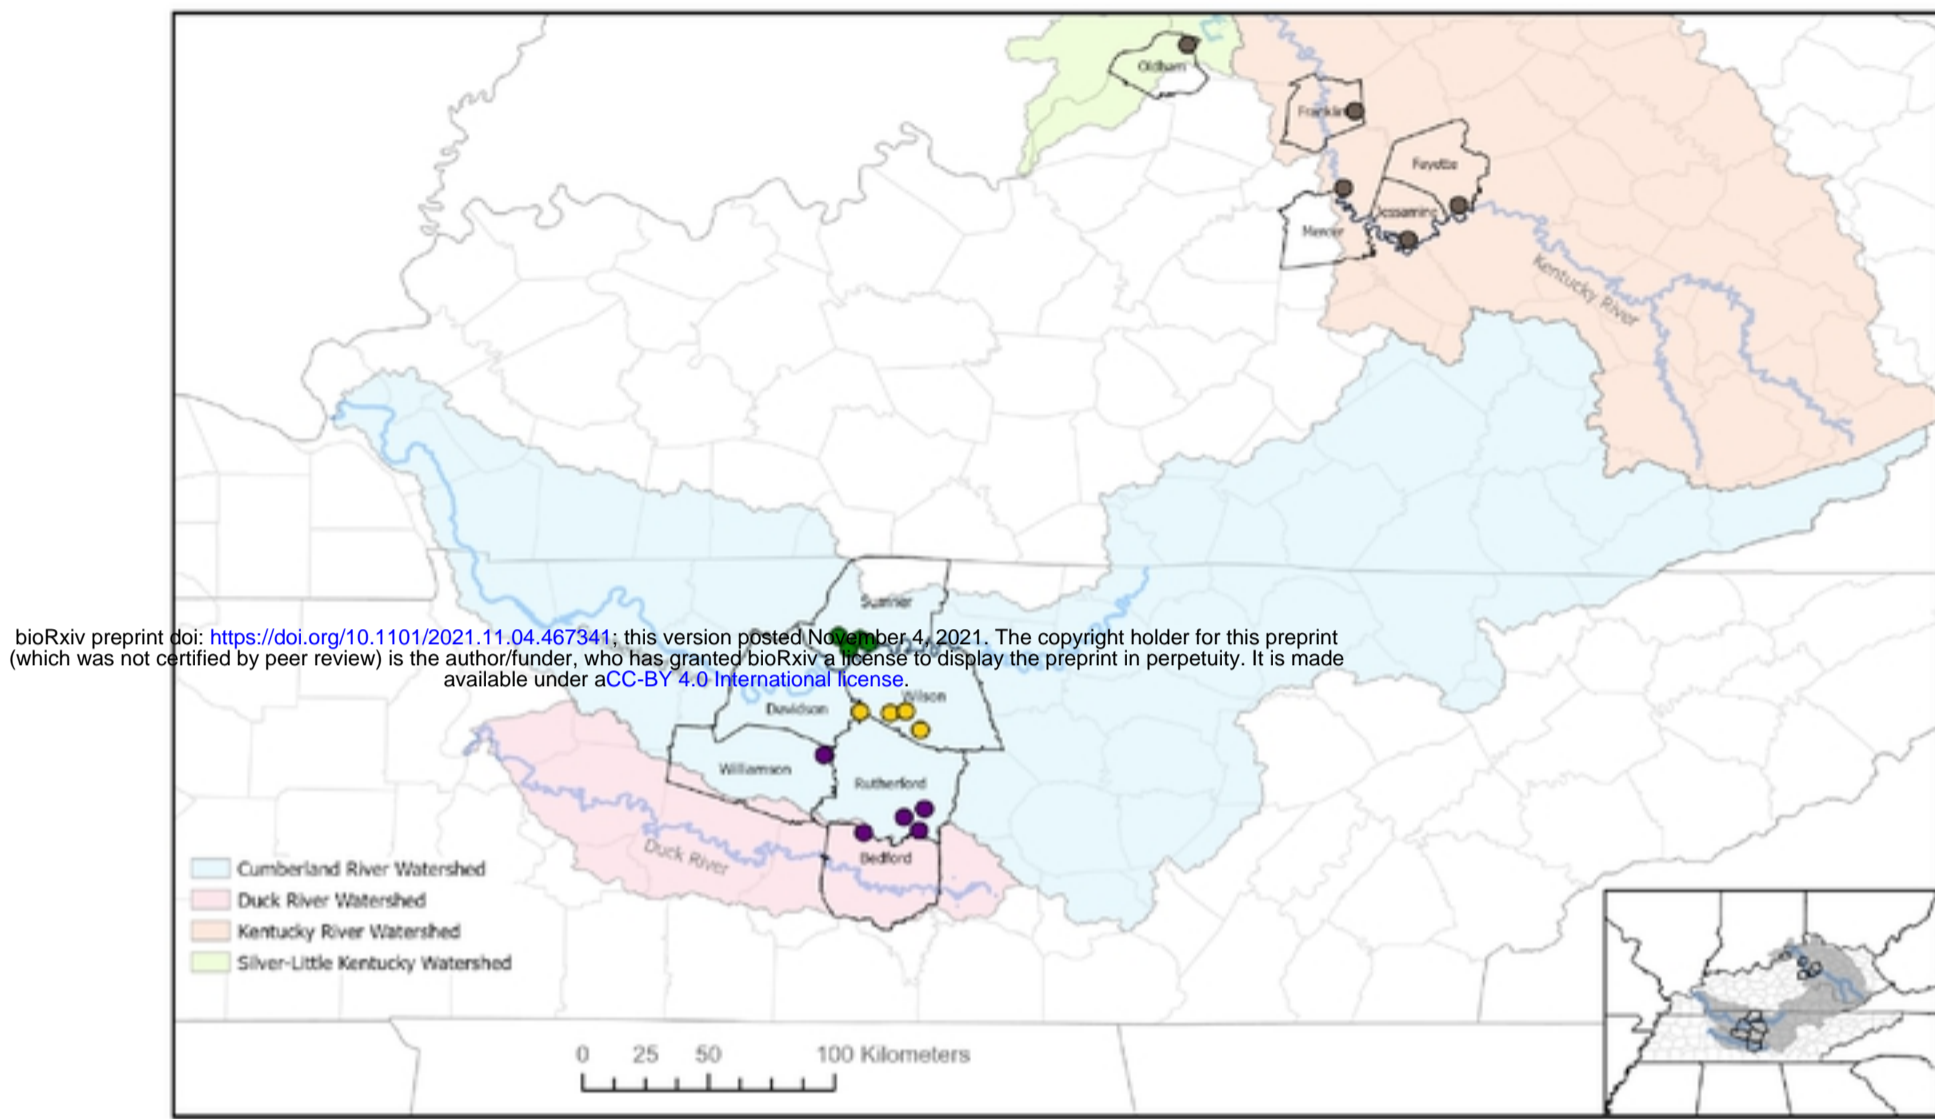



**Figure 4.** Discriminant Analysis of Principal Components (DAPC) results based on SNP genotypes A.) DAPC plot for *A. barbouri* ( $N = 198$ ) from Tennessee. Analysis assumed a value of  $K = 3$  as the optimized by BIC analysis. B.) DAPC plot for *A. barbouri* from Tennessee ( $N = 198$ ) and also including samples from five populations of *A. barbouri* in Kentucky ( $N = 17$ ). Analysis was performed using  $K = 3$  as the optimal number of genetic clusters based on BIC analysis. C) DAPC plot for *A. barbouri* from Tennessee, Kentucky, and also two populations of *A. texanum* ( $N = 4$ ). Analysis was performed using  $K = 5$  as the optimal number of genetic clusters according to the BIC analysis.

bioRxiv preprint doi: <https://doi.org/10.1101/2021.11.04.467341>; this version posted November 4, 2021. The copyright holder for this preprint (which was not certified by peer review) is the author/funder, who has granted bioRxiv a license to display the preprint in perpetuity. It is made available under aCC-BY 4.0 International license.

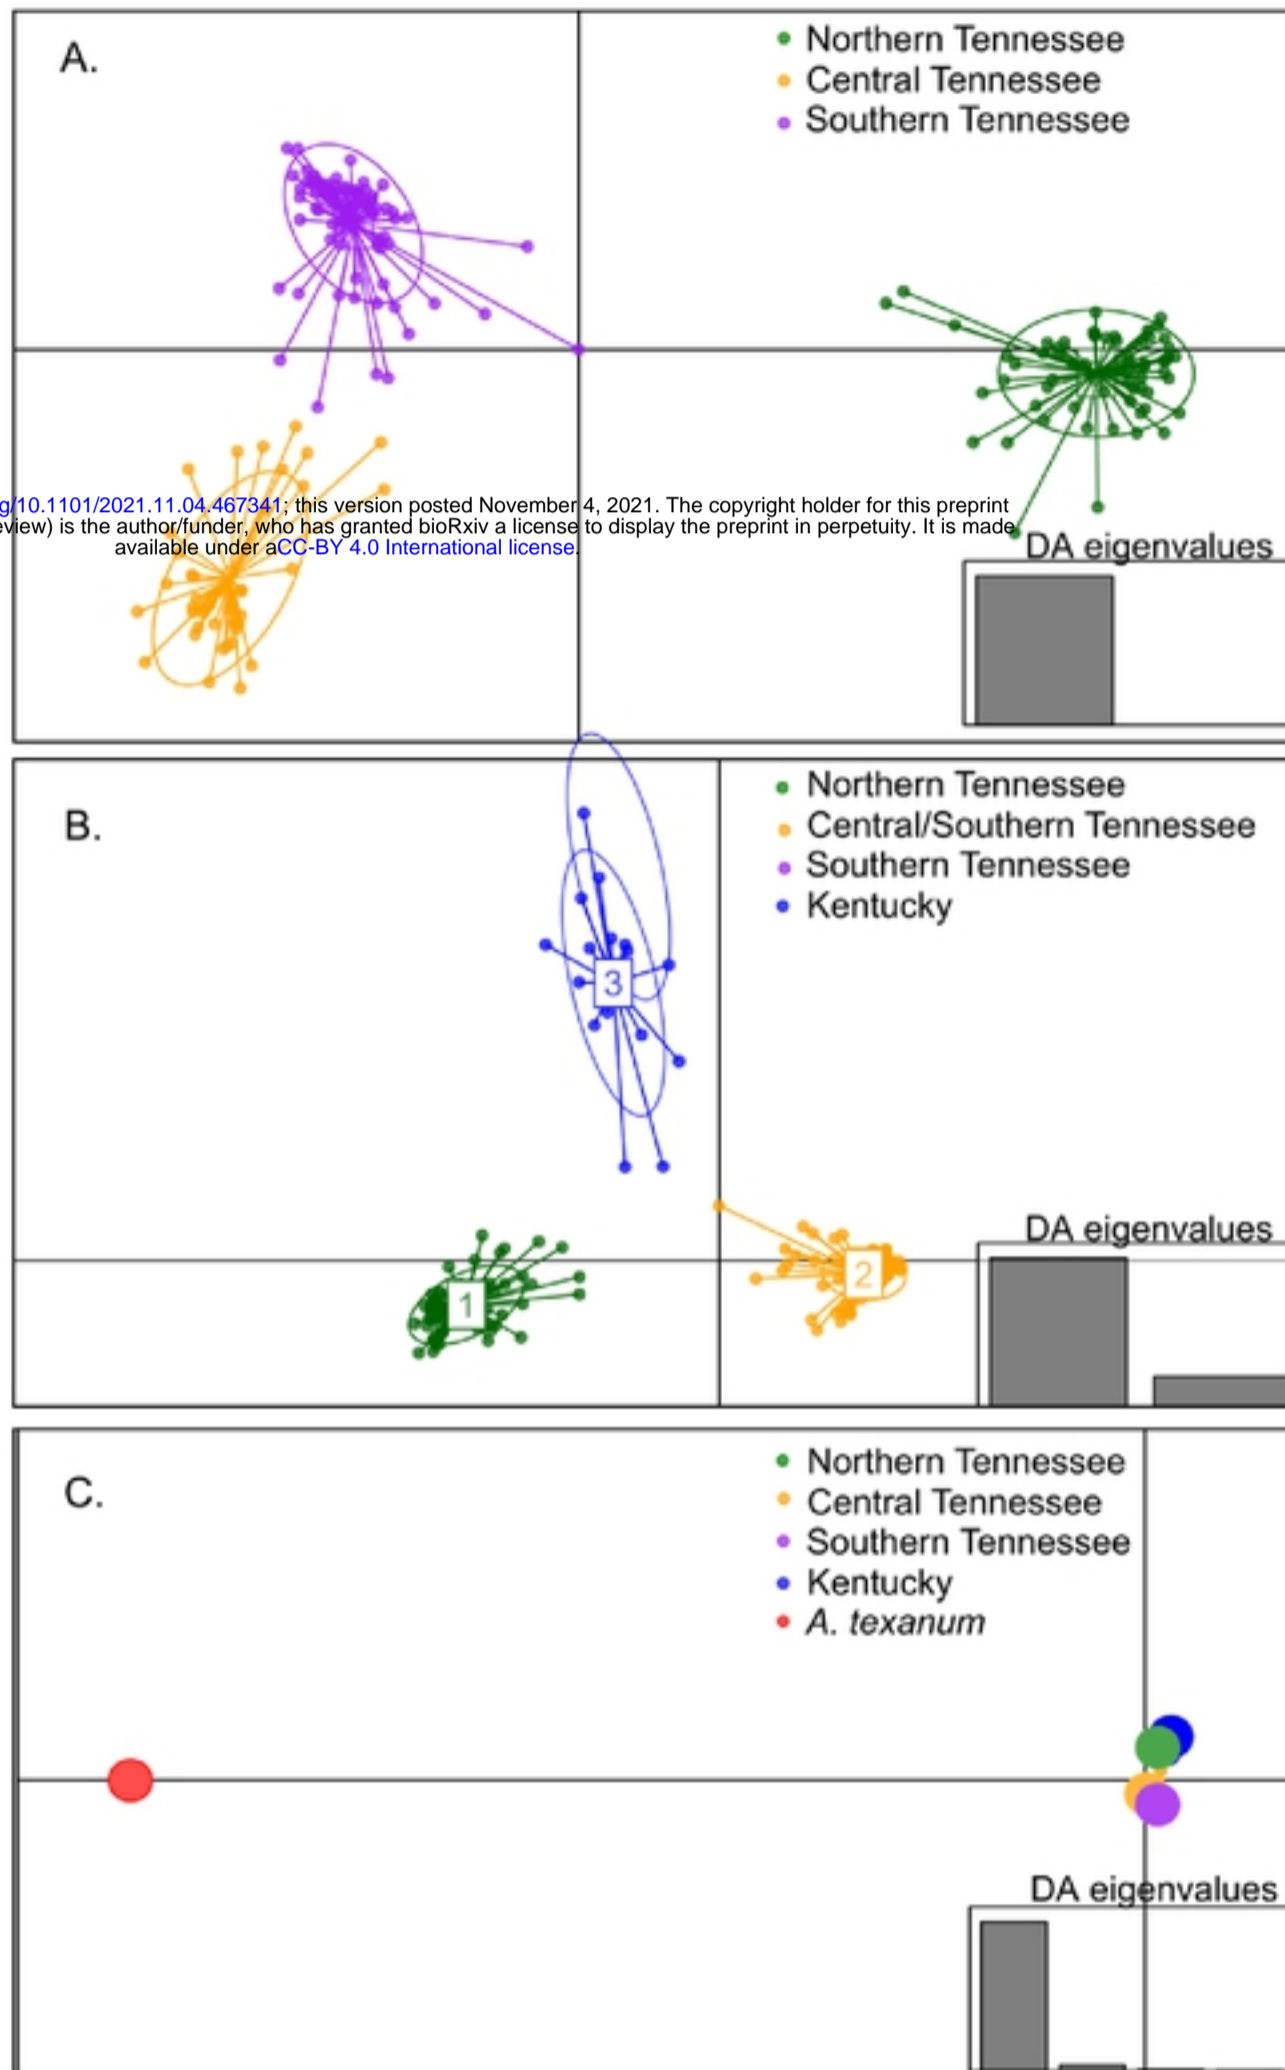

**Figure 5.** Results of Bayesian Assignment tests based on SNPs generated from GBS sequencing. Barplots indicate individual assignment probabilities for samples from 12 *A. barbouri* populations in Tennessee ( $K = 2-5$ ).

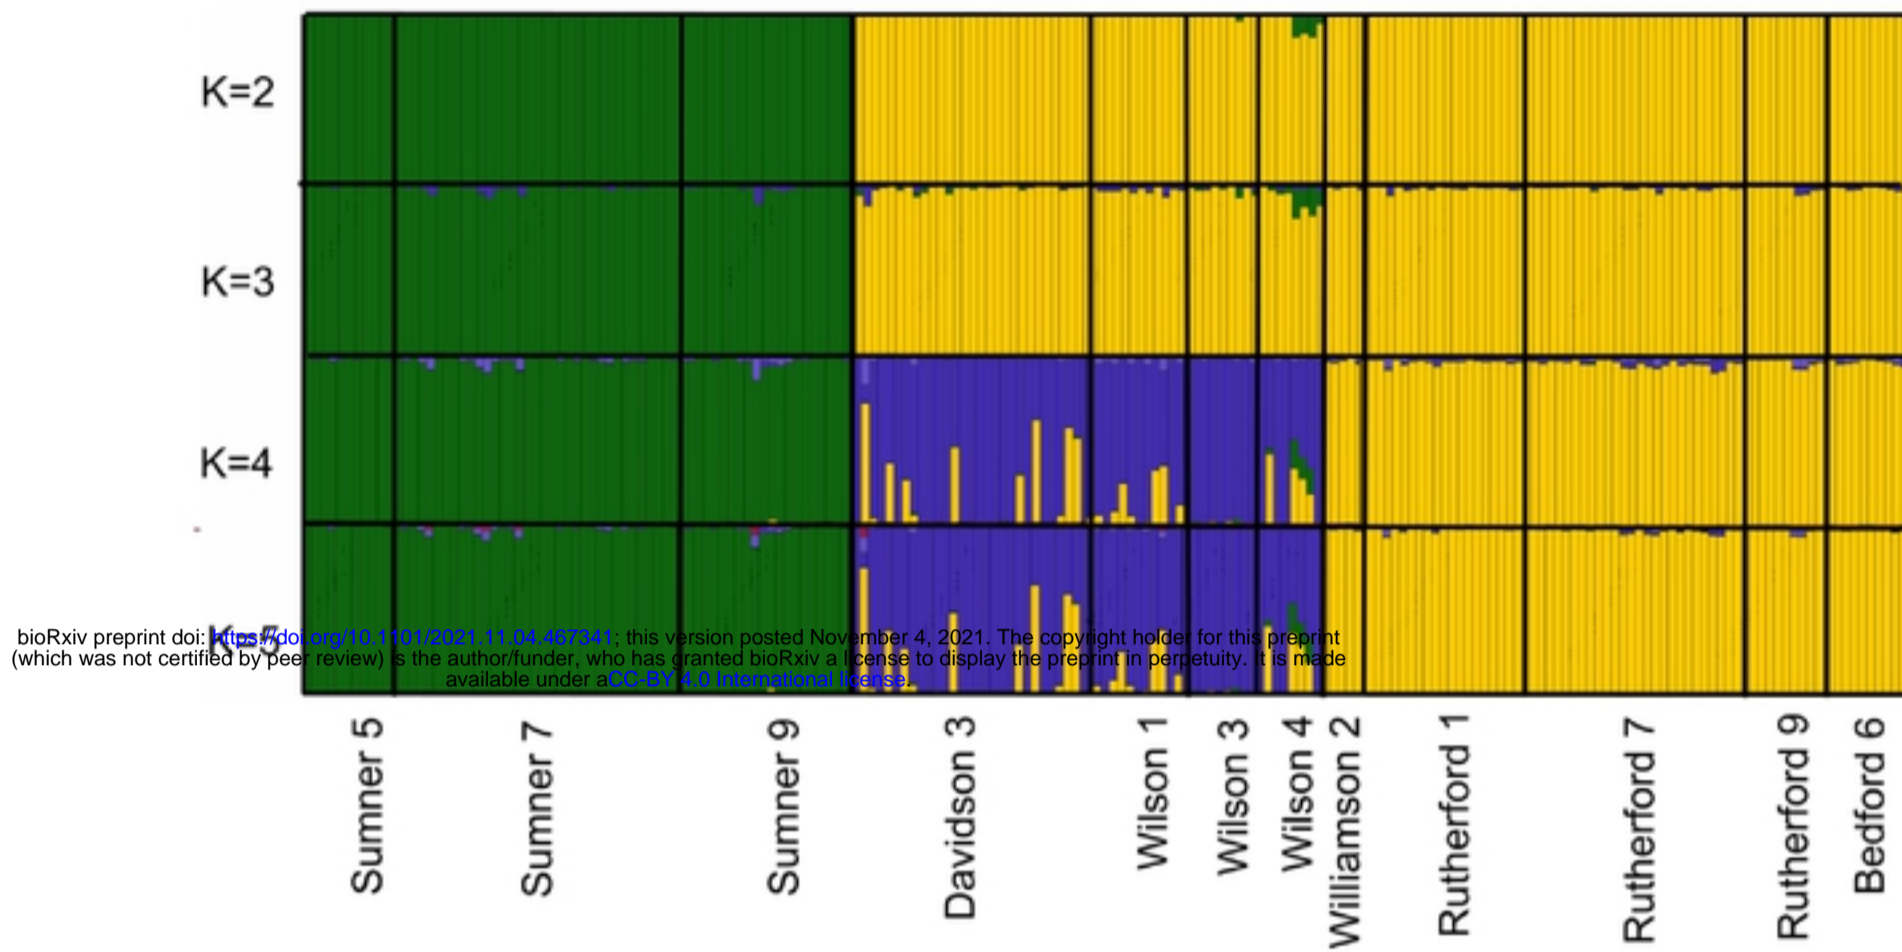

**Figure 6.** Species-tree (A) and divergence time estimates (B) from Bayesian multispecies coalescent method as implemented in the software BPP. Numbers at nodes also indicate divergence time estimates ( $t$ ). Divergence time parameter  $\tau$  was converted to time in years before present (YBP) in the BPPR statistical package in R-studio. Shading in tree indicates ESU assignments as follows: Northern ESU (green), Central ESU (Yellow) and Southern ESU (Purple).

(A)

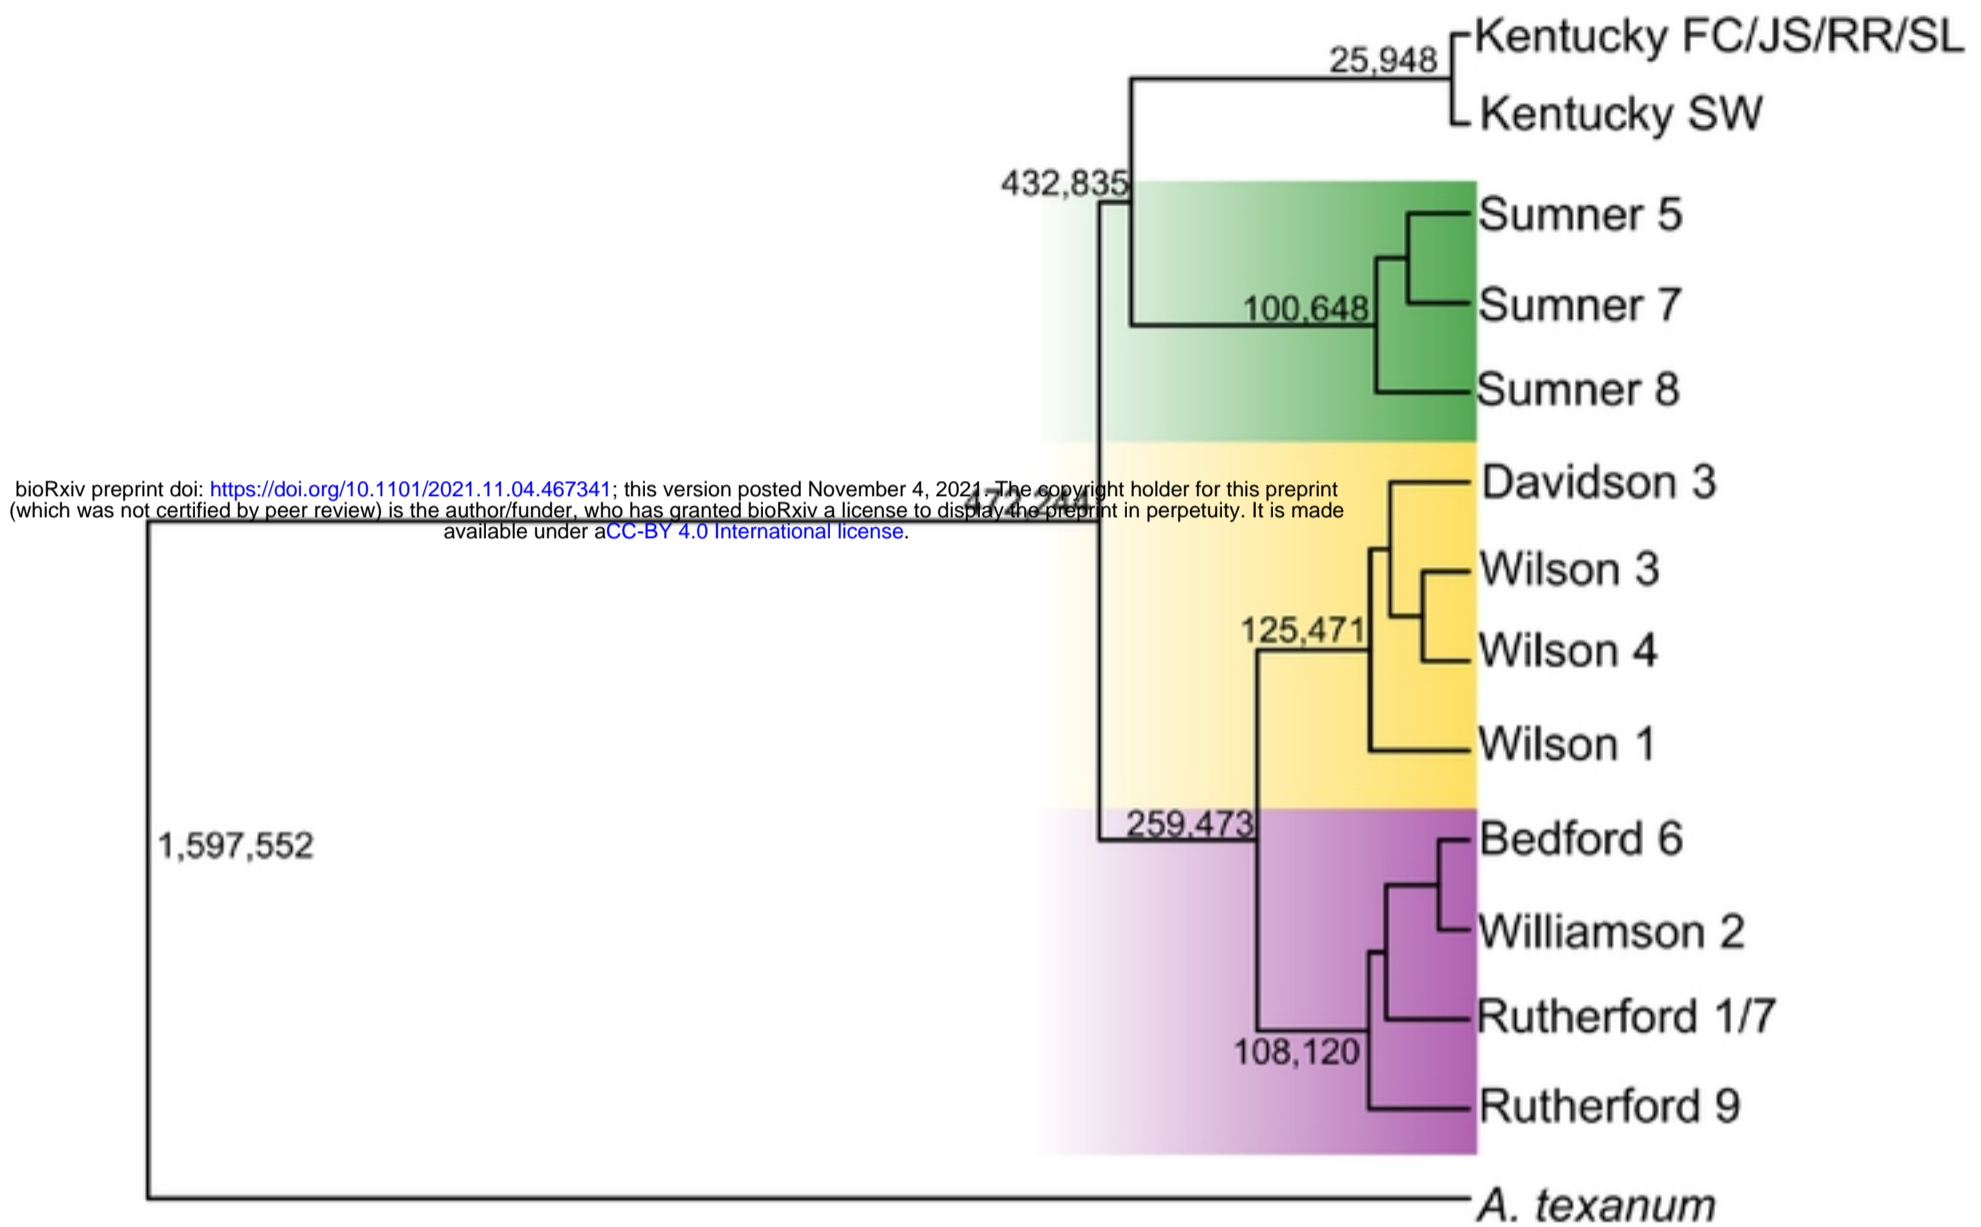

(B)

| Node                                              | TMRCA (YBP) | CI (95%)  |           |
|---------------------------------------------------|-------------|-----------|-----------|
| <i>A. texanum</i> , <i>A. barbouri</i>            | 1,597,552   | 1,169,671 | 2,062,859 |
| <i>A. barbouri</i> (all)                          | 472,244     | 313,795   | 639,208   |
| Kentucky (all), Sumner (all)                      | 472,244     | 313,795   | 639,208   |
| Kentucky (all)                                    | 24,982      | 13,432    | 41,552    |
| Sumner (all)                                      | 100,648     | 45,292    | 162,312   |
| Davidson, Wilson, Williamson, Bedford, Rutherford | 259,743     | 175,719   | 350,108   |
| Davidson, Wilson                                  | 125,471     | 75,781    | 195,323   |
| Bedford, Williamson, Rutherford                   | 108,120     | 62,980    | 164,210   |



**Figure 1.** Photo image of Tennessee *Ambystoma barbouri*.

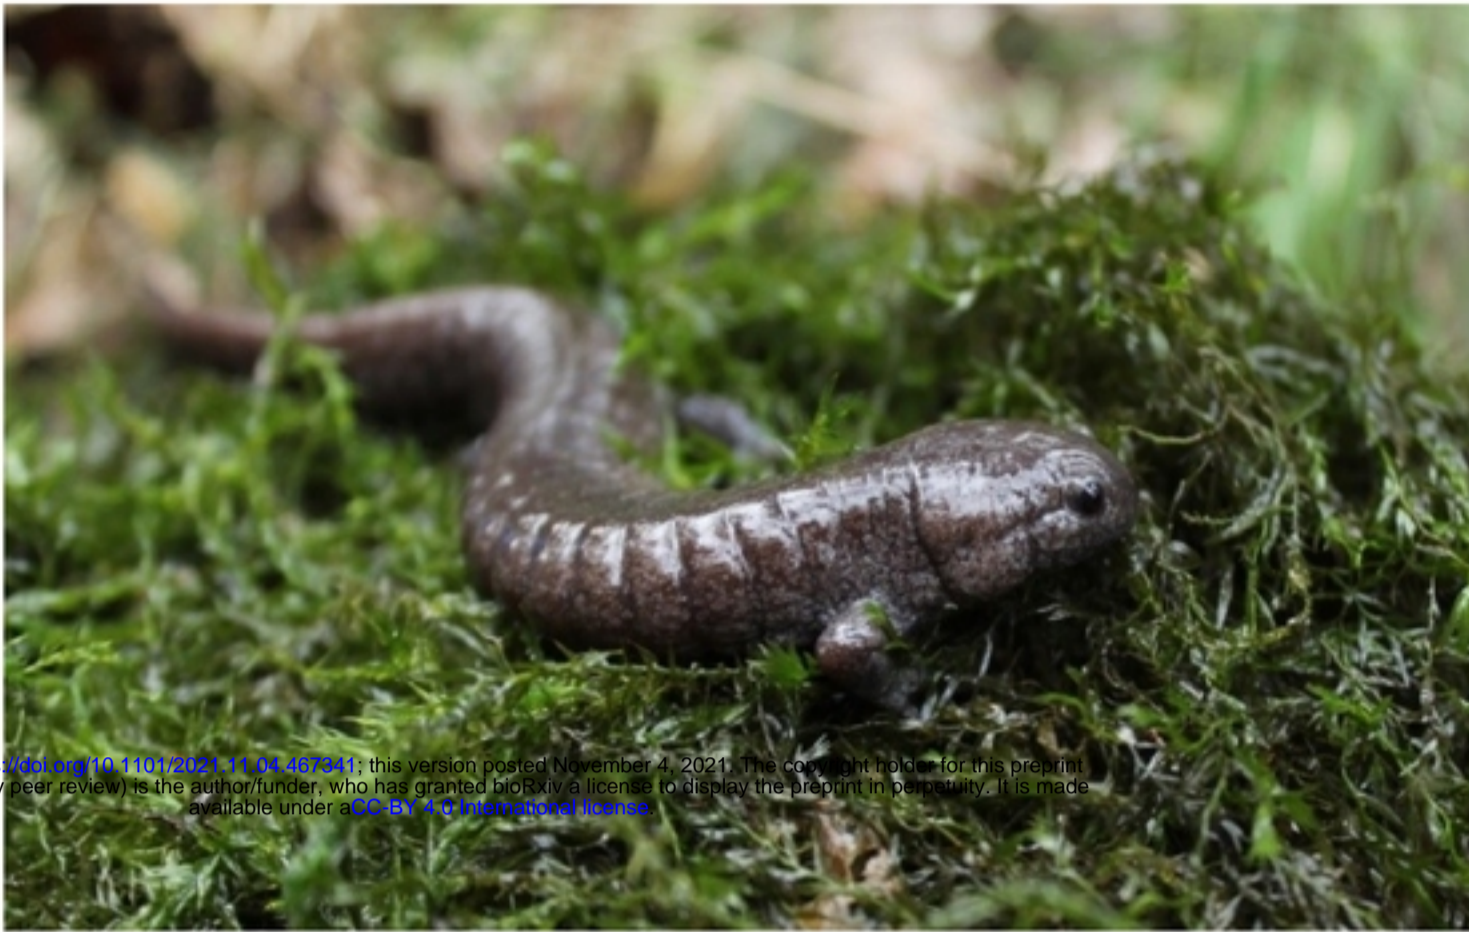

bioRxiv preprint doi: <https://doi.org/10.1101/2021.11.04.467341>; this version posted November 4, 2021. The copyright holder for this preprint (which was not certified by peer review) is the author/funder, who has granted bioRxiv a license to display the preprint in perpetuity. It is made available under aCC-BY 4.0 International license.
